# Supplementary material for: High‐throughput screening identifies suppressors of mitochondrial fragmentation in OPA1 fibroblasts
Source: PubMed Central journal article supplement (PMC8185549; doi:10.15252/emmm.202013579), 2021-05-20
Supplement: EMMM-13-e13579-s003.pdf [file EMMM-13-e13579-s003.pdf]

## Expanded View Figures

### Figure EV1. Mitochondrial morphology supervised machine learning pipeline.

Mitochondrial morphology quantification workflow using PhenoLOGIC Harmony 4.9 supervised machine learning (Dataset EV1). Fluorescence imaging of cells (1) followed by nuclei (2) and cell segmentation (3) using cytoplasm defined by mitochondria. Cells on the border of the field of view are excluded from downstream analyses (4). Mitochondrial signal intensity is transformed into various texture parameters (5). (6) Supervised ML is trained using cells harboring mitochondria that are fragmented (*Opa1* siRNA, red), hypertubulated (*Dnm1l* siRNA, blue), or normal (NT siRNA, green). Debris cells (yellow) not included in the classification. (7) Class segregation represented by goodness of fit and then applied to unknown, non-trained images (8).

Mitochondrial morphology supervised machine learning pipeline

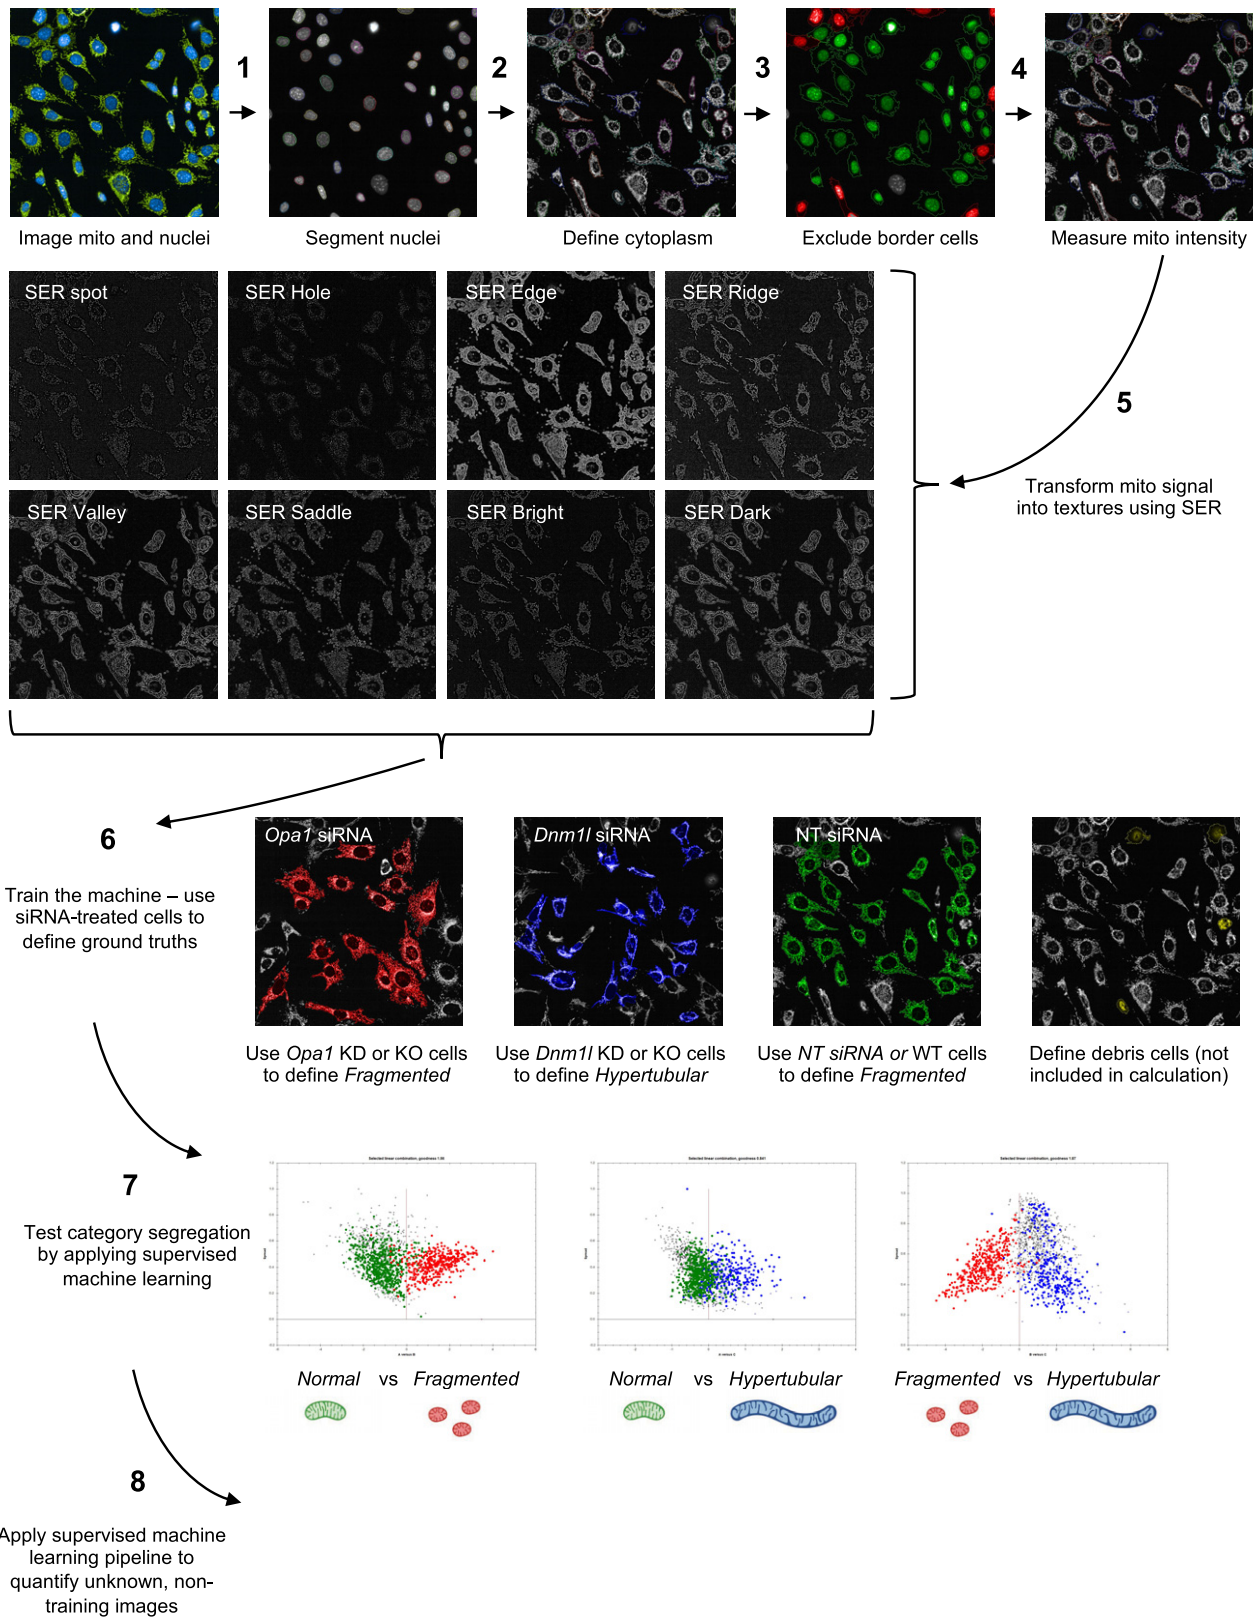

Figure EV1.

**Figure EV2. High-throughput screening identifies known and novel genetic modifiers of mitochondrial morphology in control and DOA+ patient-derived fibroblasts.**

- A, B Representative confocal images of candidate genes (siRNAs) able to fragment (B) or hypertubulate (A) mitochondrial morphology identified in *Mitome* screen of control (CTL-1) fibroblasts (Fig 2A–C) Scale bar = 50  $\mu$ m.
- C, D Representative confocal images of candidate genes (siRNAs) able to rescue (C) or hyperfragment (D) mitochondrial morphology identified in *Mitome* screen of *OPA1*<sup>5545R</sup> patient fibroblasts (Fig 2E and F) Scale bar = 50  $\mu$ m.
- E Violin plot representing % Hyperfragmented morphology of ground truth and *Mitome* siRNAs. The siRNA able to hyperfragment mitochondrial morphology in *OPA1*<sup>5545R</sup> patient fibroblasts were selected with a univariate 3-components statistical model programmed in R using ground truths for morphology in Fig 2E. The defined threshold for positive hits was 72.9% (dotted line) and identified 27 candidate genes (Dataset EV3) from the same experiment as shown in Fig 2E.
- F, G (F) Representative confocal images and (G) mitochondrial morphology quantification of control (CTL-1) fibroblasts and *OPA1*<sup>5545R</sup> patient fibroblasts treated with indicated siRNAs for 72 h. Scale bar=50 $\mu$ m. Supervised ML training performed on cells with fragmented (*OPA1* siRNA), normal (non-targeting NT siRNA), and hypertubulated (*DNM1L* siRNA) mitochondria. Data represent mean  $\pm$  SD of measurement of 419–1,783 cells performed once.
- H Functional classification of 91 candidate genes that rescued mitochondrial fragmentation in *OPA1*<sup>5545R</sup> fibroblasts upon depletion (Dataset EV3).

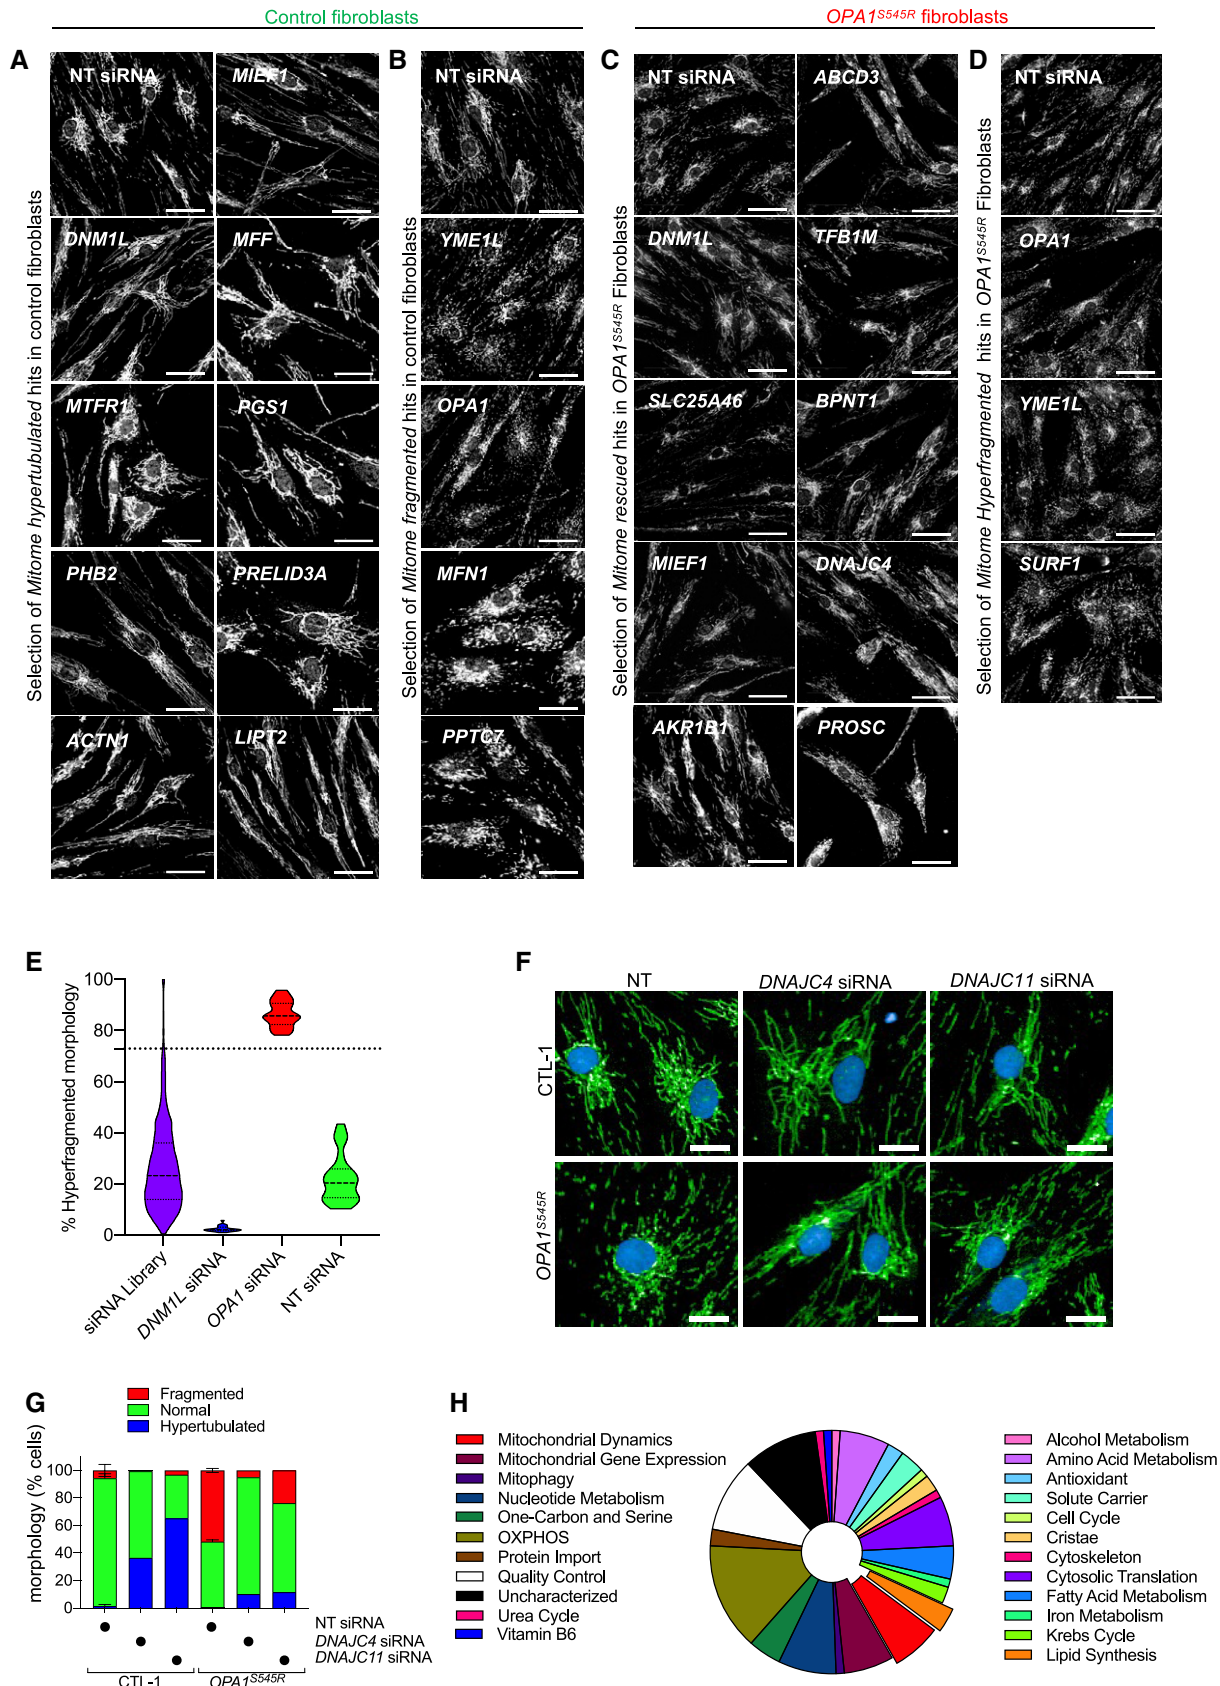

Figure EV2.

**Figure EV3. PGS1 depletion rescues mitochondrial fragmentation in OPA1-deficient human and mouse fibroblasts.**

- A *Opa1* splice isoforms in MEFs. Proteolytic cleavage sites for MPP, OMA1, and YME1L are indicated. TM, transmembrane domain.
- B Equal amounts of protein extracted from WT and *Opa1*<sup>KO</sup> MEFs were separated by SDS–PAGE, immunoblotted with indicated antibodies. WT and *Opa1*<sup>Crispr</sup> immunoblots from Fig 3G are cropped and included for reference.
- C Quantitative RT–PCR (qRT–PCR) measurement of *Opa1* and *Pgs1* expression in indicated *Opa1*<sup>Crispr</sup> MEFs complemented with pLenti-*Opa1* and *Opa1*<sup>Crispr</sup>*Pgs1*<sup>Crispr</sup> MEFs complemented with pLenti-Pgs1 relative to WT control. Data represent mean ± SD of two independent experiments, unpaired *t*-test; \*\**P* < 0.01, \*\*\*\**P* < 0.0001, ns; not significant.
- D (left) quantitative RT–PCR (qRT–PCR) measurement of normalized *Opa1* expression (relative to *Gapdh*) WT MEFs treated with *Opa1* siRNA for 72 h relative to NT (non-targeting) control. Data represent mean ± SD of 4 independent experiments, unpaired *t*-test; \*\**P* < 0.001. (right) Equal amounts of protein extracted from WT MEFs treated with indicated siRNAs for 72 h were separated by SDS–PAGE, immunoblotted for OPA1.
- E Representative confocal images of WT, *Opa1*<sup>Crispr</sup>, and *Opa1*<sup>Crispr</sup> MEFs complemented with pLenti-*Opa1*-Myc. Mitochondria (mitoYFP, green) and nuclei (DAPI, blue) and *Opa1*-Myc (anti-Myc, red). Scale bar = 10 μm.
- F Mitochondrial morphology quantification of (E) using WT MEFs treated with *Opa1* siRNA (fragmented), NT siRNA (normal), or *Dnm1l* siRNA (hypertubulated) ground truth training sets. Data represent mean ± SD of six independent experiments (1,693–3,200 cells per cell line), One-way ANOVA (% fragmented); \*\**P* < 0.001, ns; not significant.
- G Equal amounts of protein extracted from MEFs were separated by SDS–PAGE, immunoblotted with indicated antibodies. Horizontal line denotes separate membranes.
- H Mitochondrial membrane potential measured in WT, *Opa1*<sup>Crispr</sup>, *Opa1*<sup>Crispr</sup> + pLenti-*Opa1*-Myc MEFs labeled with TMRE and analyzed by flow cytometry. TMRE/mitoYFP was used to normalize membrane potential. Data represent mean ± SD of three independent experiments (> 10,000 cells/sample), One-way ANOVA.



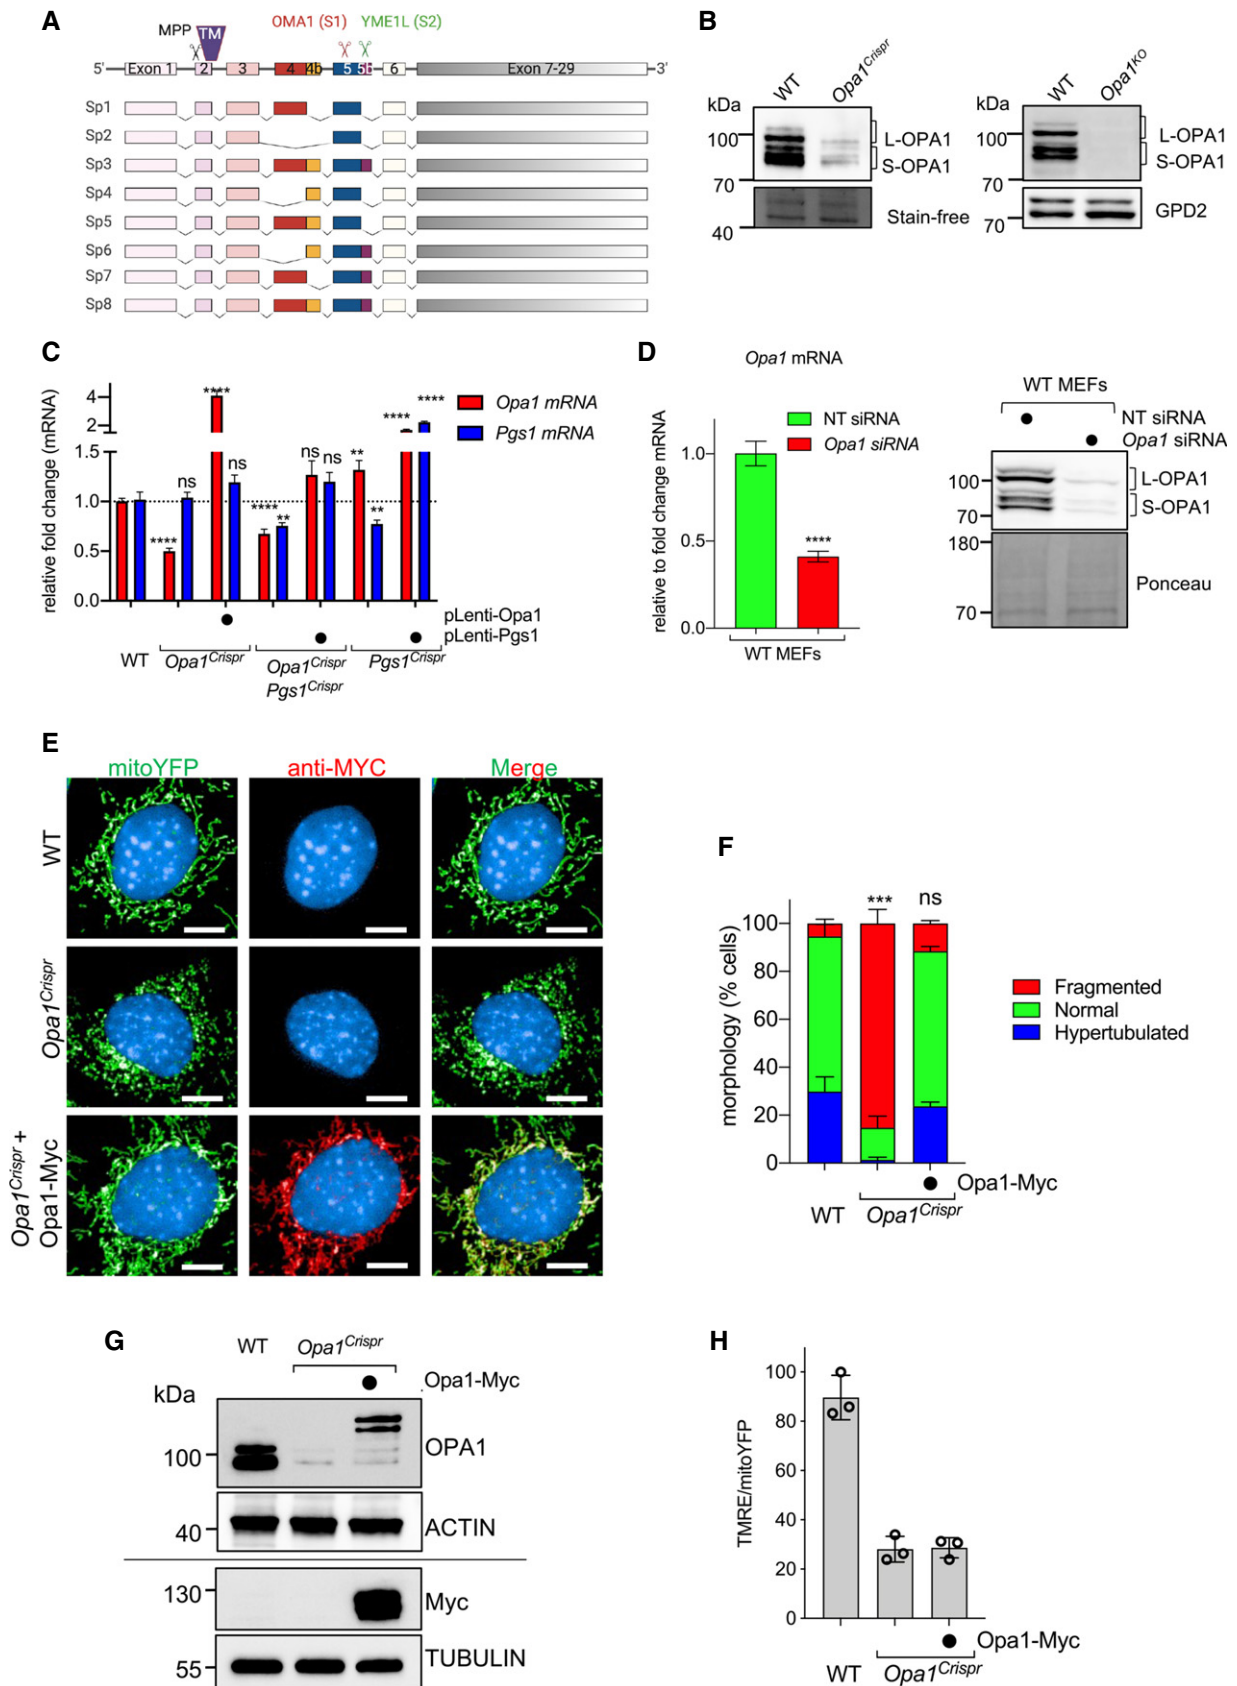

Figure EV3.

**Figure EV4. PGS1 depletion rescues mitochondrial fragmentation by inhibiting mitochondrial fission independently of DRP1 recruitment and OPA1 processing.**

- A, B (A) Equal amounts of protein extracted from WT and mutant MEFs stably expressing pLenti-Opa1 or pLenti-Pgs1 where indicated were separated by SDS-PAGE, immunoblotted with indicated antibodies and quantified by densitometry (B) relative to tubulin. Data represent mean  $\pm$  SD of four independent experiments.
- C Equal amounts of protein extracted from WT MEFs treated with 20  $\mu$ M CCCP (30 min) or 16  $\mu$ M 4Br-A23187 (18 h) were separated by SDS-PAGE, immunoblotted with indicated antibodies. Tubulin was used as loading control.
- D Representative confocal images of MEFs knocked in for mTurquoise2-Dnm1l by Crispr/Cas9 genome editing in WT ( $WT^{Drp1K}$ ) and  $Opa1^{Crispr}$  ( $Opa1^{Crispr-Drp1K}$ ) MEFs treated with non-targeting (NT) or *Pgs1* siRNA for 72 h. DRP1 (mTurquoise2, purple), mitochondria (mitoYFP, green). Scale bar = 20  $\mu$ m.
- E Bar graph representation of DRP1 localized to mitochondria (blue) vs cytosol (green). Data represent mean  $\pm$  SD of five replicates (193–1,062 cells per cell line), One-way ANOVA.

Source data are available online for this figure.

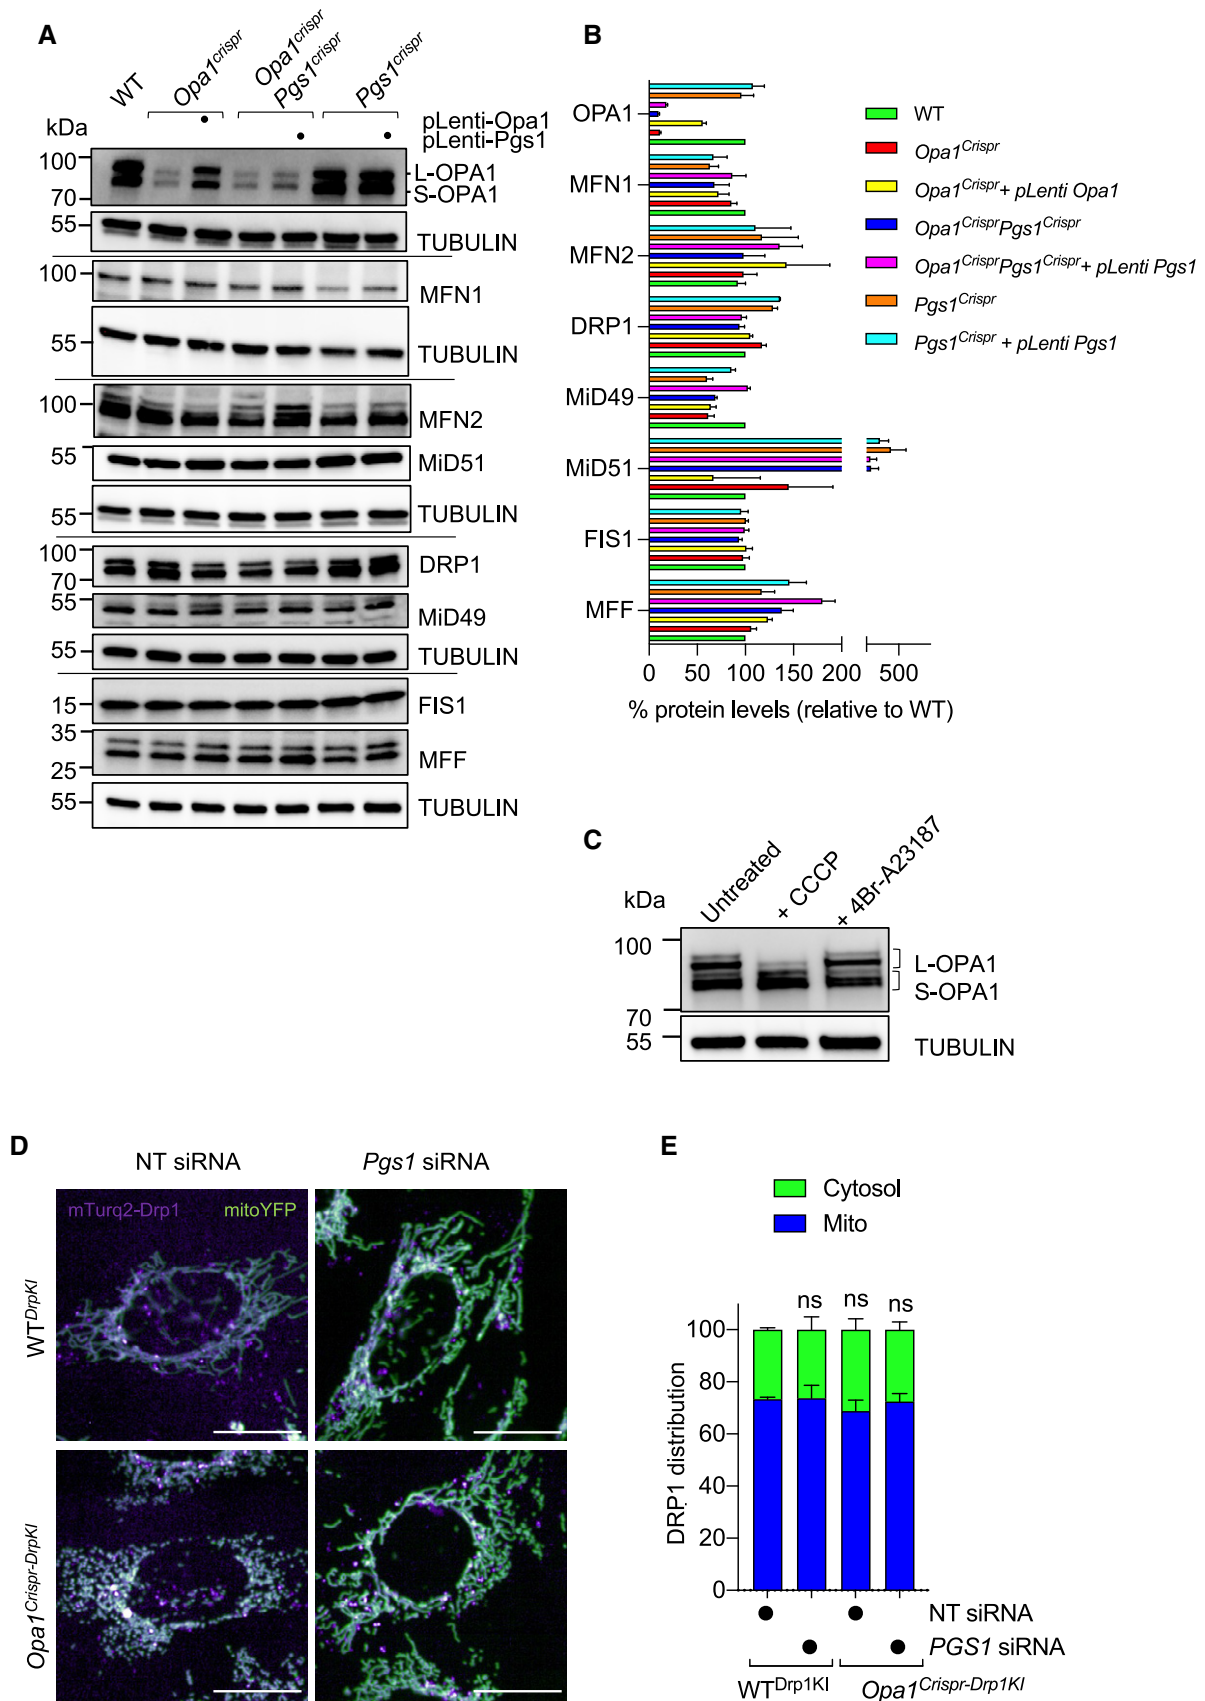

Figure EV4.



**Figure EV5. Cardiolipin remodeling in OPA1 and PGS1-deficient fibroblasts.**

- A Representative confocal micrographs of MEFs WT and *Opa1*<sup>KO</sup> MEFs treated with indicated siRNAs for 72 h. Mitochondria (anti-TOMM40, green) and nuclei (DAPI, blue). Scale bar = 10  $\mu$ m.
- B Mitochondrial morphology quantification of (a) using WT MEFs treated with *Opa1* siRNA (fragmented), NT siRNA (normal), or *Dnm1l* siRNA (hypertubulated) training sets. Data represent mean  $\pm$  SD of two independent experiments, (185–2,689 cells per cell line), One-way ANOVA (% fragmented); \*\*\*\**P* < 0.0001.
- C Representative confocal images of wild-type (WT) and *Yme1l*<sup>-/-</sup> MEFs treated with indicated siRNAs for 72 h. Live imaging of mitochondria labeled with MitoTracker Deep Red (MTDR, green), TMRE (pink), and NucBlue (Nuclei, blue). Scale bar = 10  $\mu$ m.
- D Supervised ML mitochondrial morphology quantification of (c) using WT MEFs treated with *Opa1* siRNA (fragmented), NT siRNA (normal), or *Dnm1l* siRNA (hypertubulated) training sets. *Opa1*<sup>KO</sup> MEFs (from Fig EV3B) are represented for comparison.
- E Quantification of mitochondrial membrane potential (TMRE/MTDR) of cells imaged in (C). Number of analyzed cells inset. Data represent mean  $\pm$  SD of one independent experiments, One-way ANOVA; \*\*\**P* < 0.001, \*\*\*\**P* < 0.0001.

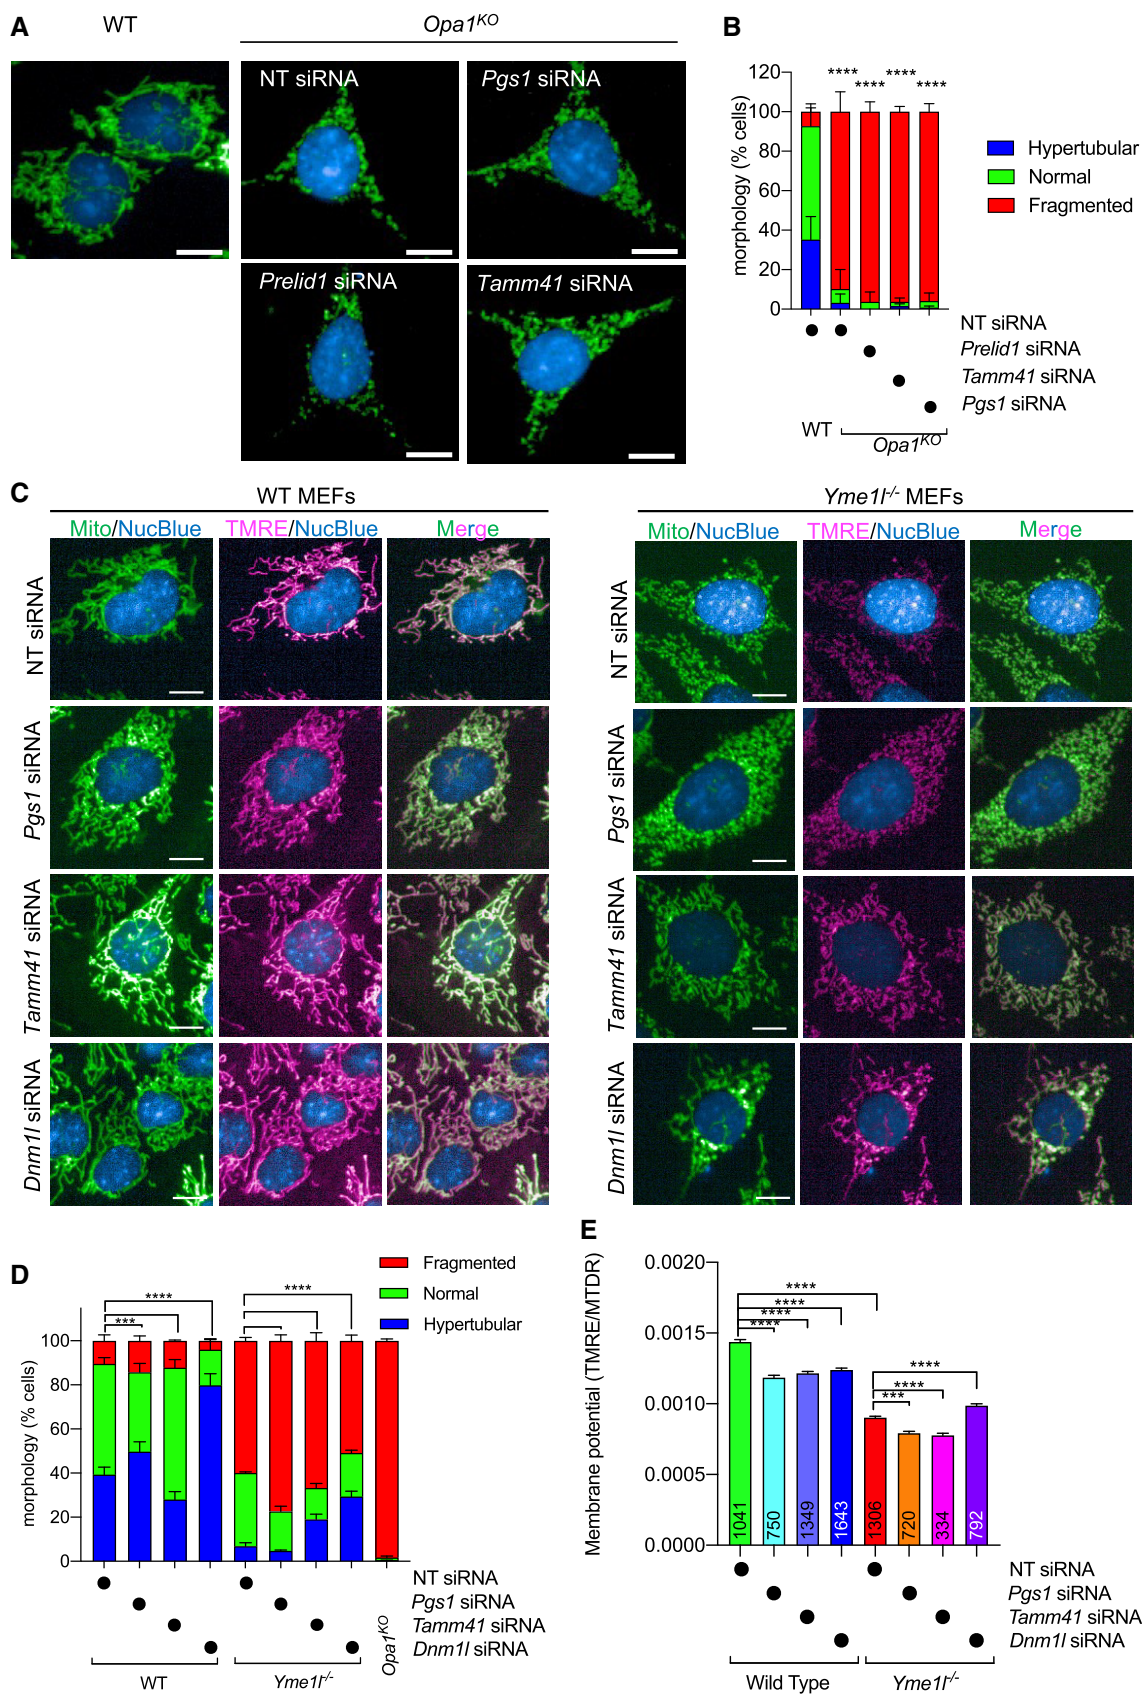

Figure EV5.

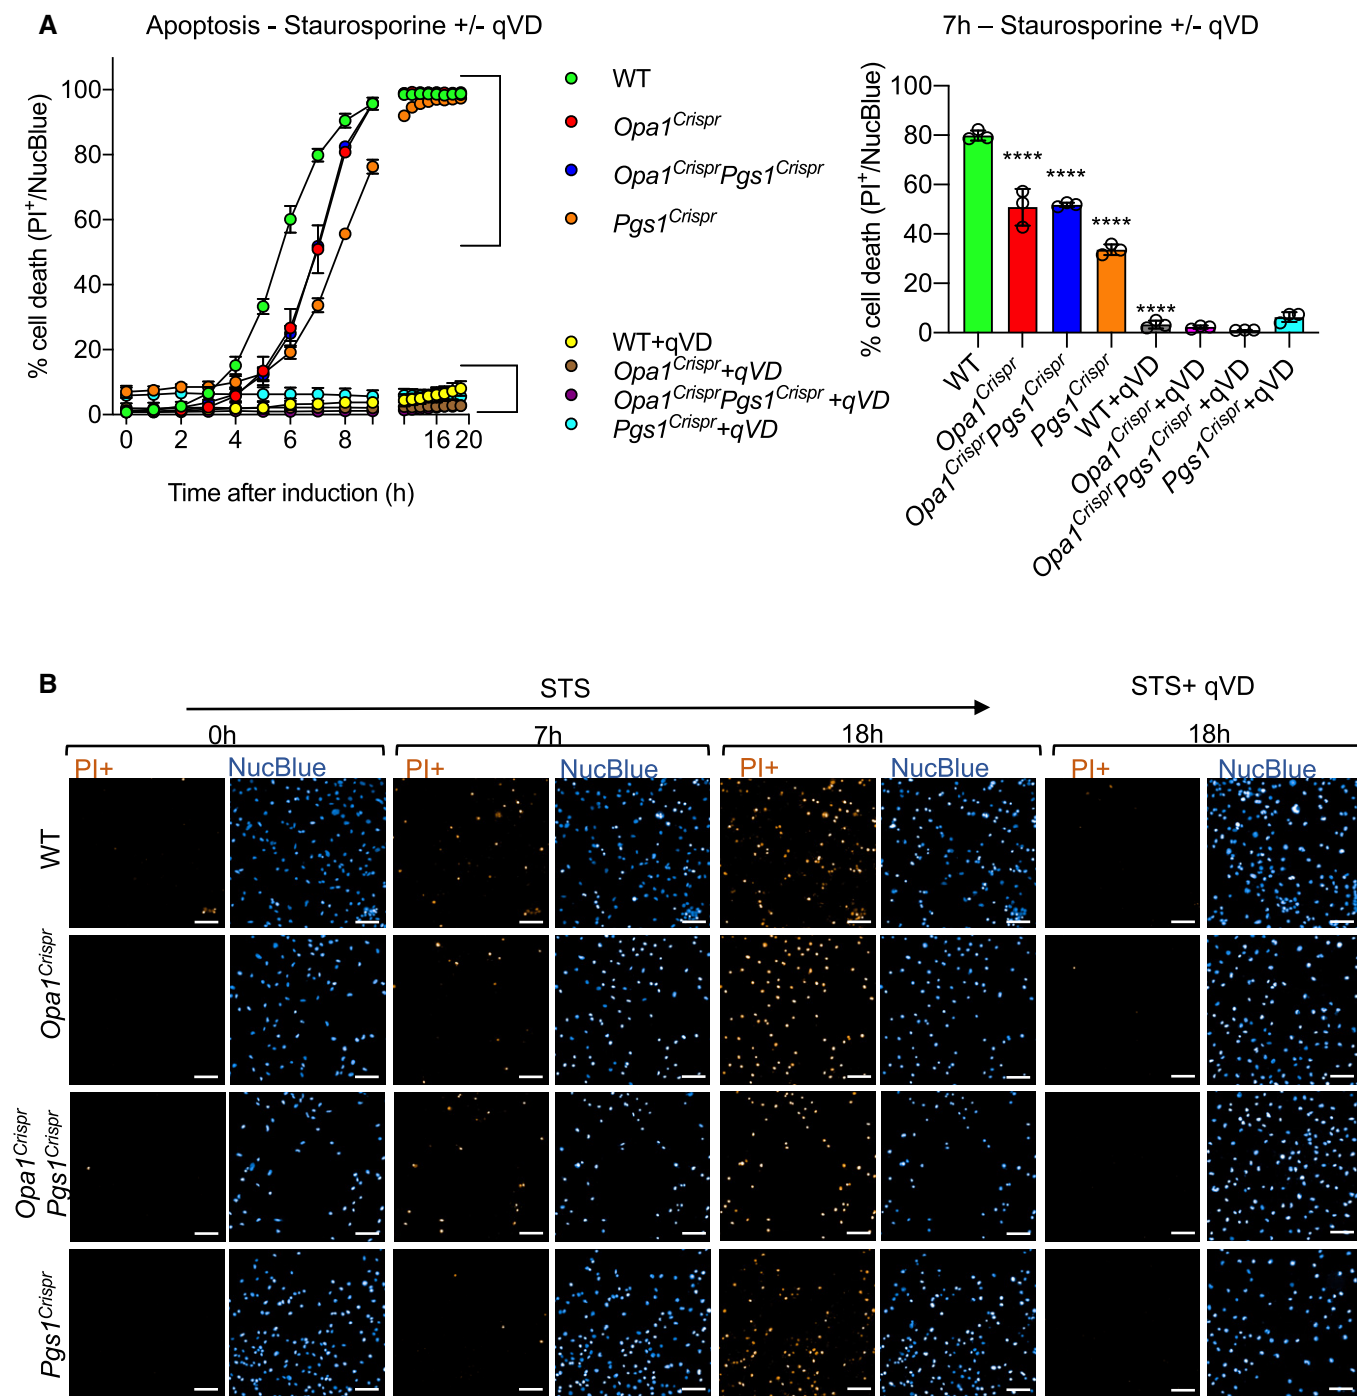

**Figure EV6. PGS1 depletion does not restore apoptotic phenotype of OPA1-deficient MEFs.**

A, B (A) MEFs of the indicated genotypes were subjected to 0.5  $\mu$ M staurosporine in the presence or absence of the pan-caspase inhibitor qVD. Dead cells (PI<sup>+</sup> nuclei, orange) and total cells (NucBlue, blue) were imaged every hour for 25 h. PI<sup>+</sup> nuclei number divided by the total nuclei number was then quantified over time.

(B) Representative confocal images of (A). Scale bar = 100  $\mu$ m. Data represent mean  $\pm$  SD of three independent experiments (1,923–4,703 cells per cell line) One-way ANOVA, \*\*\*\* $P$  < 0.0001.

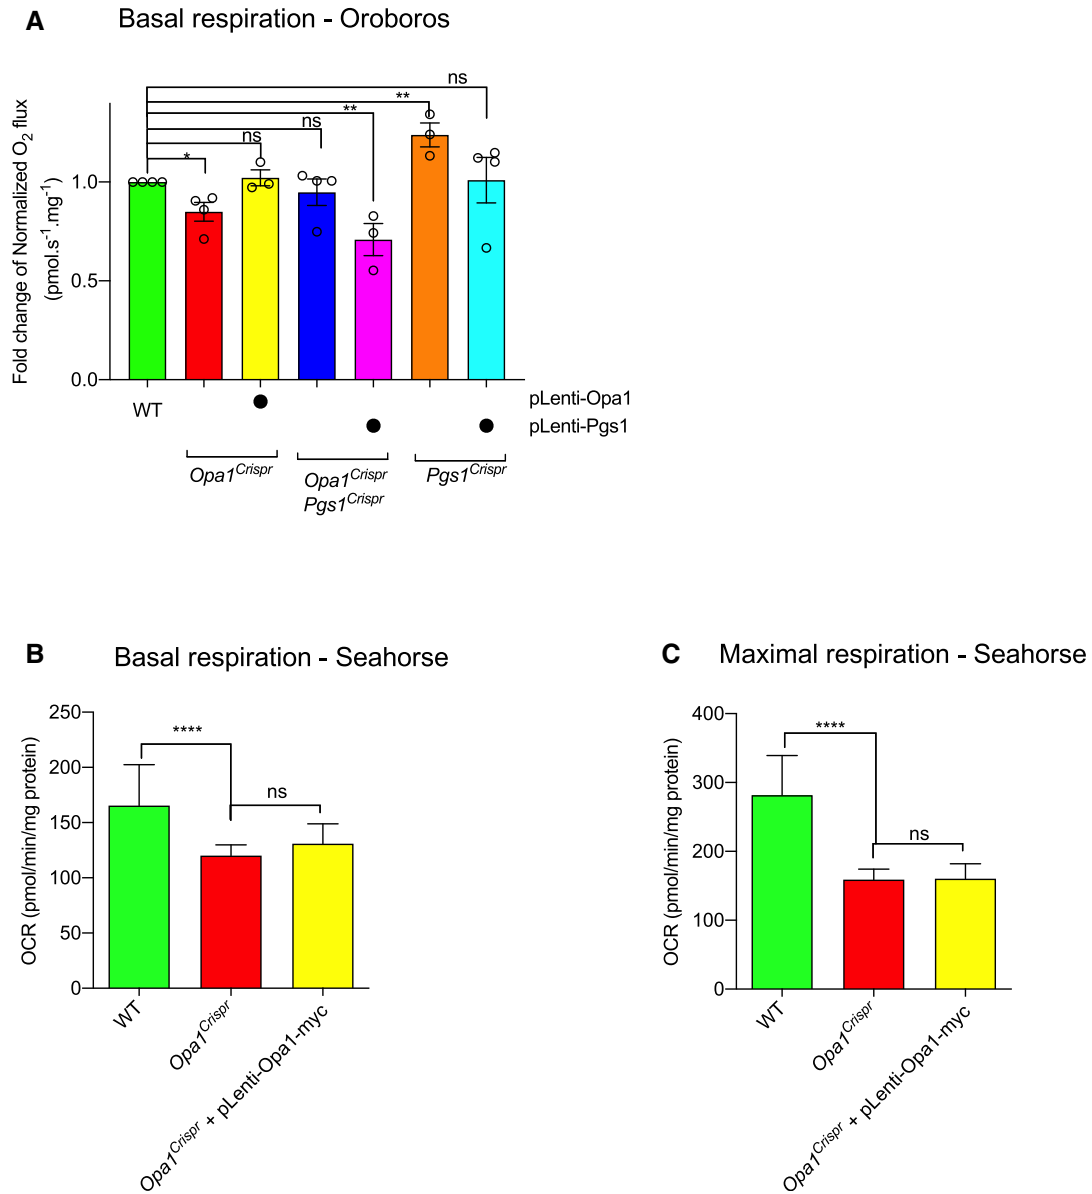

**Figure EV7. OPA1-Myc does not complement respiration defect in OPA1-deficient MEFs.**

- A Basal oxygen consumption ( $\text{JO}_2$  flux) measured by O2k high-resolution respirometry (Oroboros) in WT,  $Opa1^{Crispr}$ ,  $Opa1^{Crispr}$  + pLenti-Opa1,  $Opa1^{Crispr} Pgs1^{Crispr}$ ,  $Opa1^{Crispr} Pgs1^{Crispr}$  + pLenti-Pgs1,  $Pgs1^{Crispr}$  and  $Pgs1^{Crispr}$  MEFs + pLenti-Pgs1. Measurements were made in pairwise fashion compared with WT MEFs.  $\text{O}_2$  flux normalized to protein concentration. Data represent mean  $\pm$  SD of at least three independent experiments, unpaired  $t$ -test; \* $P$  < 0.05, \*\* $P$  < 0.01, ns, not significant.
- B, C Mitochondrial respiration measured in adherent MEFs of the indicated genotypes using Seahorse FluxAnalyzer. Oxygen consumption rate (OCR) normalized to protein concentration. Following basal respiration, cells were treated sequentially with 1  $\mu\text{M}$  Oligomycin (Omy), 2  $\mu\text{M}$  CCCP (maximal). Bar graphs of representing basal (B) and maximal (C) respiration. Data represent mean  $\pm$  SEM of 22–24 parallel OCR measurement, One-way ANOVA, \*\*\*\* $P$  < 0.0001, ns, not significant.
