# Supplementary material for: High‐throughput screening identifies suppressors of mitochondrial fragmentation in OPA1 fibroblasts
Source: PubMed Central journal article supplement (PMC8185549; doi:10.15252/emmm.202013579), 2021-05-20
Supplement: EMMM-13-e13579-s007.pdf [file EMMM-13-e13579-s007.pdf]

## **High-throughput screening identifies suppressors of mitochondrial fragmentation in *OPA1* fibroblasts**

Emma CRETIN<sup>1,2</sup>, Priscilla LOPES<sup>1</sup>, Elodie VIMONT<sup>1</sup>, Takashi TATSUTA<sup>3</sup>, Thomas LANGER<sup>3,4</sup>, Anastasia GAZI<sup>5</sup>, Martin SACHSE<sup>5</sup>, Patrick YU-WAI-MAN<sup>6-9</sup>, Pascal REYNIER<sup>10,11</sup>, Timothy WAI<sup>1,2\*</sup>

### **APPENDIX**

#### **Contents: Appendix Figures S1-S8**

Appendix Figure S1: Mitochondrial morphology quantification in fibroblasts and Western blot analysis of human fibroblasts

Appendix Figure S2: STRING analysis of Mitome screen hits identified in control human fibroblasts.

Appendix Figure S3: STRING analysis of Mitome screen hits discovered in DOA+ fibroblasts and validation of PGS1 downregulation in *OPA1*-deficient HeLa cells.

Appendix Figure S4: Mitochondrial morphology and stress-induced hyperfusion analysis in *Opa1*-deficient MEFs.

Appendix Figure S5: DRP1 recruitment assays in MEFs

Appendix Figure S6: Membrane potential and kinetic imaging of fission and hyperfusion in MEFs

Appendix Figure S7: Determination of cardiolipin profiling and phosphatidic acid accumulation in MEFs.

Appendix Figure S8: Kinetic cell death imaging in MEFs triggered by etoposide

**A**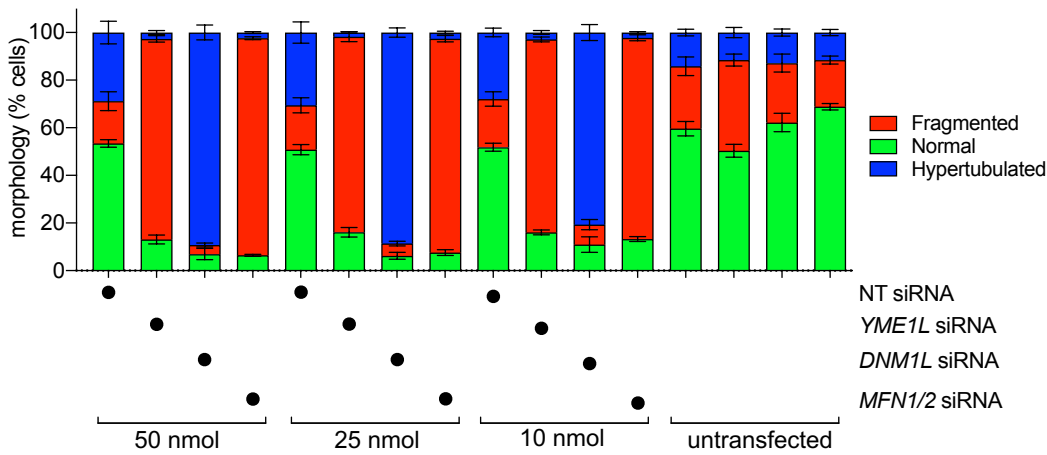**B**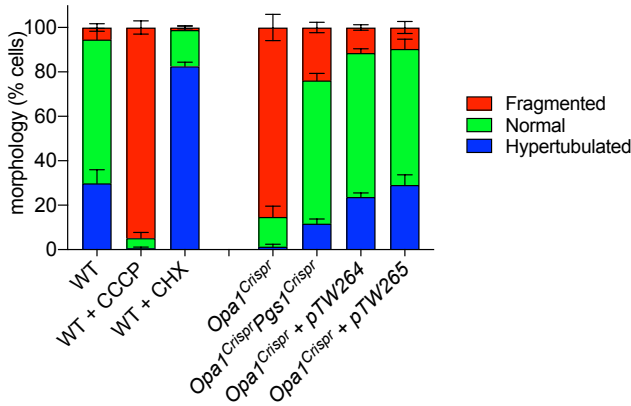**D**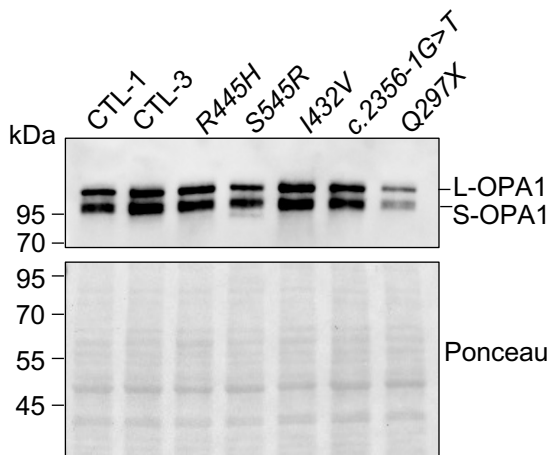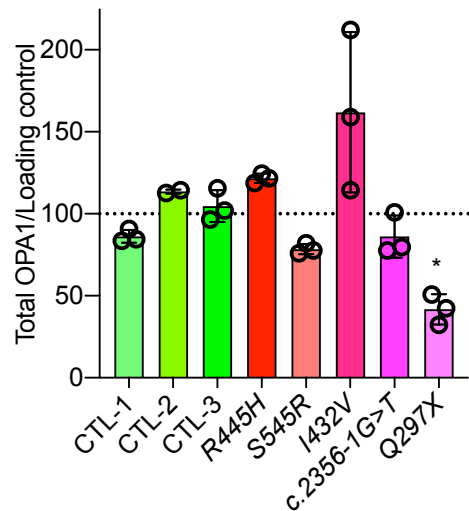

### Appendix Figure S1: Mitochondrial morphology quantification in fibroblasts and Western blot analysis of human fibroblasts

**(A)** Mitochondrial morphology quantification of control (CTL-1) fibroblasts treated with indicated siRNAs at the indicated doses for 72 hours. Supervised ML training performed on cells with fragmented (*OPA1* siRNA), normal (non-targeting NT siRNA), and hypertubulated (*DNMT1L* siRNA) mitochondria. Data represent mean  $\pm$  SD of 3 independent experiments, (1005 to 2803 cells per cell line per replicate), One-way ANOVA. **(B)** Supervised ML performed on mitochondrial morphologies generated by chemical manipulation (fragmented, CCCP, hypertubulated, cycloheximide (CHX)) classify *Opa1*-deficient MEFs (*Opa1*<sup>Crispr</sup>) from Figure 3E before and after stable functional complementation with of *Opa1*s1-Myc (plasmid pTW264, Dataset EV5) or *Opa1*s7-Myc (plasmid pTW265, Dataset EV5) and *Opa1*<sup>Crispr</sup> MEFs additional deleted of *Pgs1* from Figure 3E (*Opa1*<sup>Crispr</sup>*Pgs1*<sup>Crispr</sup>). Data represent mean  $\pm$  SD of 3-6 independent wells (1693 to 2554 cells per cell line), One-way ANOVA (% normal).

**(C)** Equal amounts of protein extracted from control and (CTL1, 2, 3) and DOA+ patient fibroblasts were separated by SDS-PAGE, immunoblotted with anti-OPA1 antibody, and quantified by densitometry relative to Ponceau stain. Data represent mean  $\pm$  SD of three independent experiments with the exception of CTL-2, which was measured twice, One-way non-parametric ANOVA (Kruskal-Wallis) (relative to mean of CTL1, 2 and 3 combined); \* $p > 0.05$ .

## A Mitochondrial fragmentation

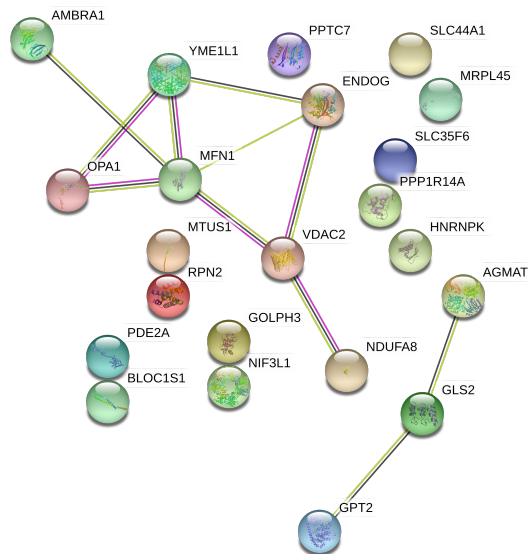

## B Mitochondrial hypertubulation

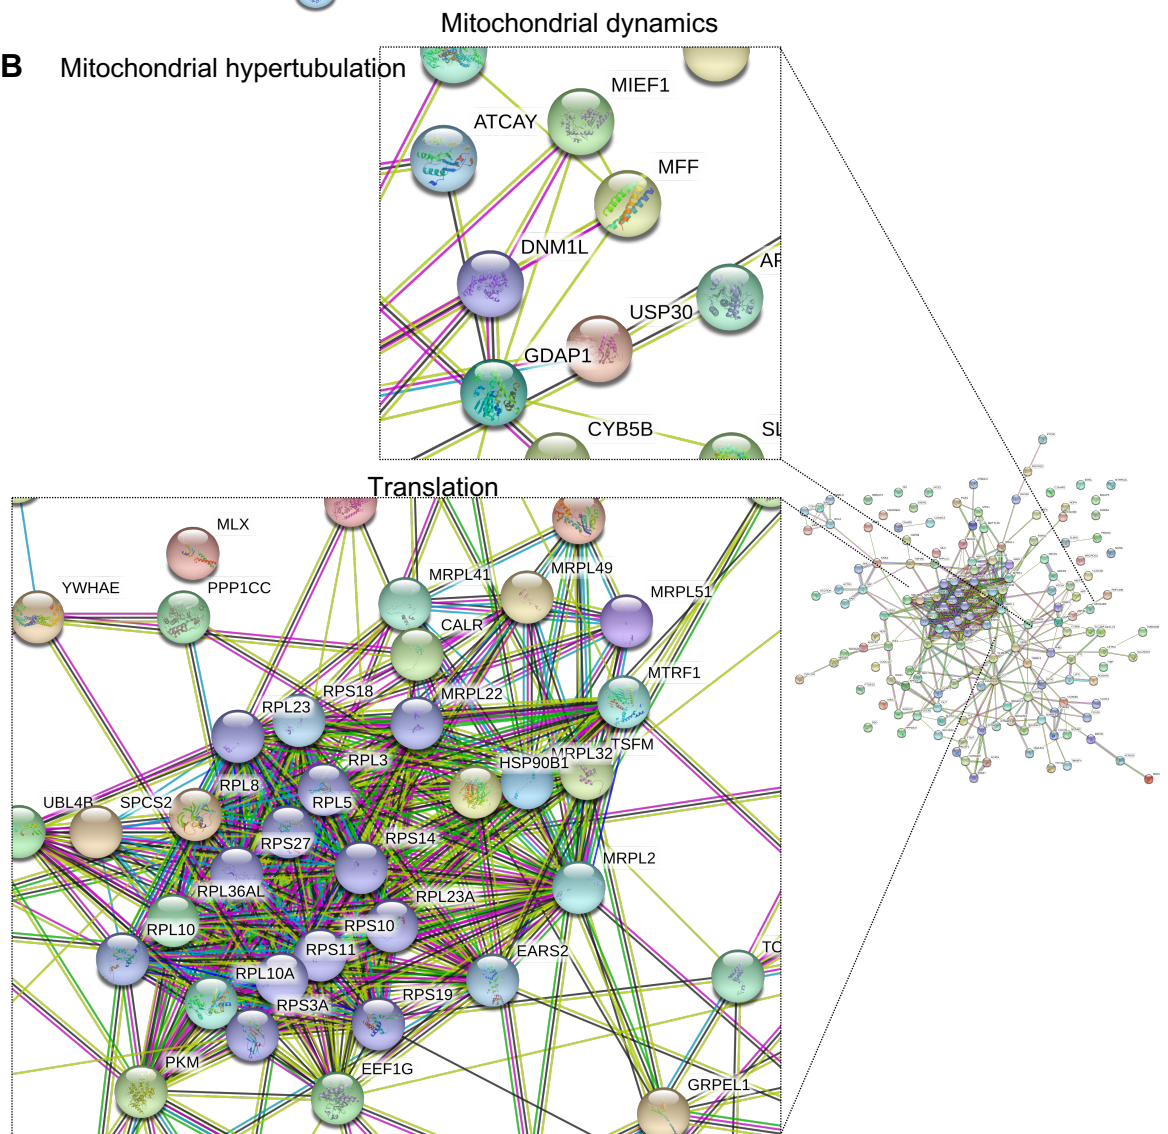

**Appendix Figure S2: STRING analysis of Mitome screen hits identified in control human fibroblasts.**

**(A)** String analysis clustering of 22 candidate genes that stimulate mitochondrial fragmentation upon depletion (Dataset EV2)

**(B)** String analysis clustering of 145 candidate genes that stimulate mitochondrial hypertubulation upon depletion (Dataset EV2), including clusters related to mitochondrial dynamics (top inset) and protein translation (bottom inset), (Dataset EV2).

### Appendix Figure 3

**A**

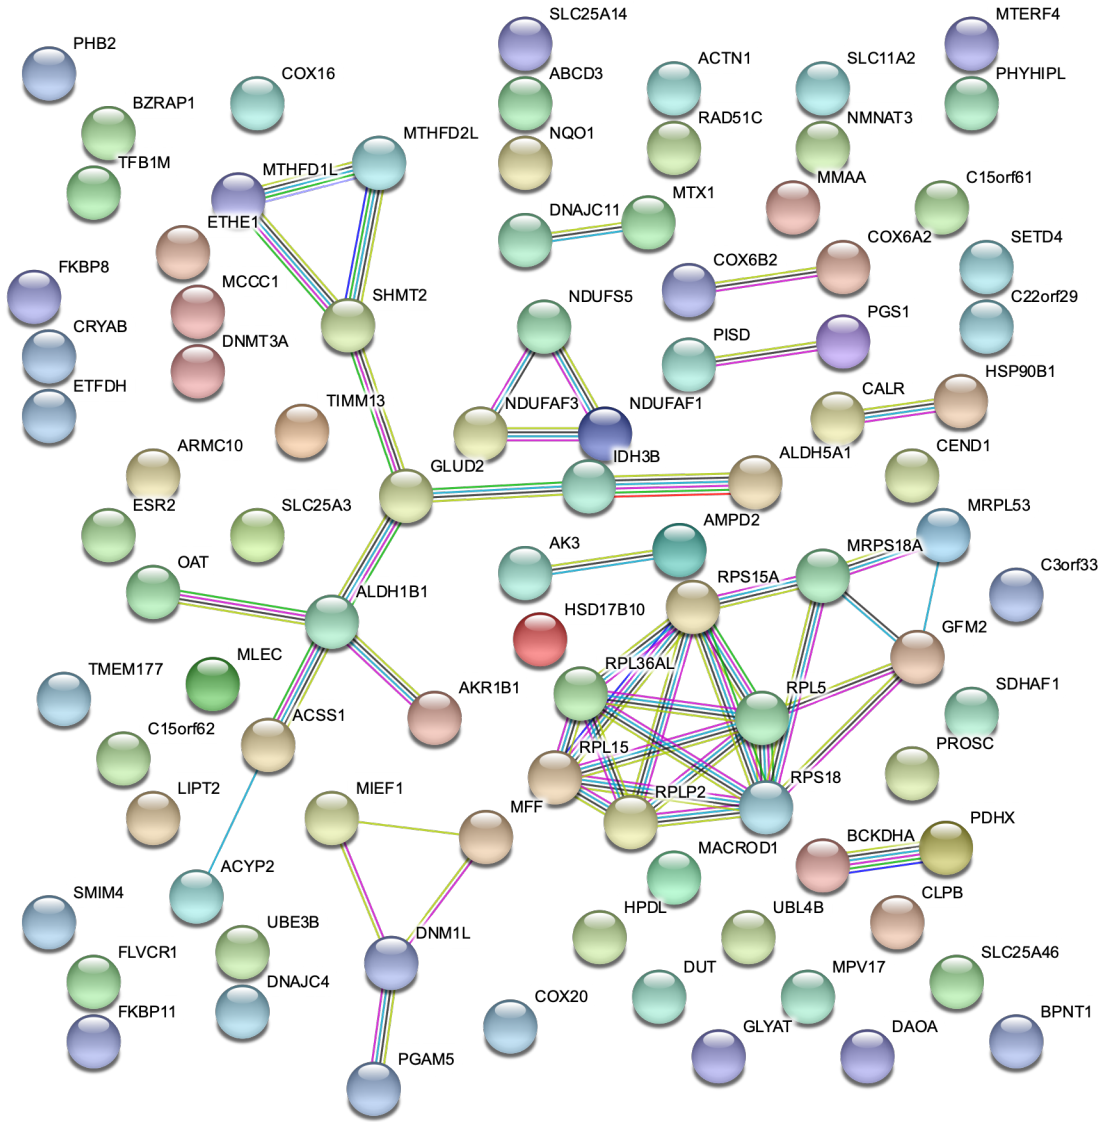

**B**

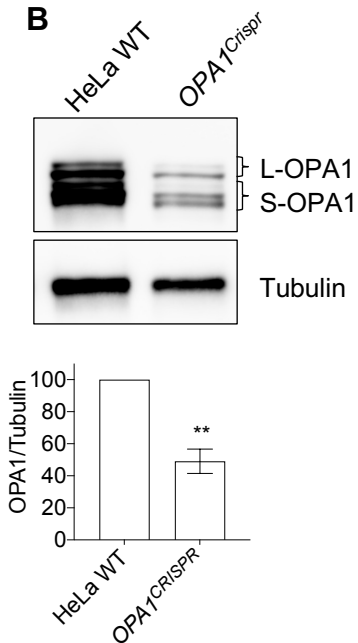

**C**

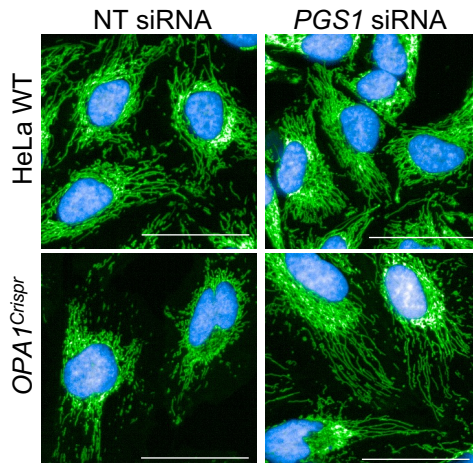

**D**

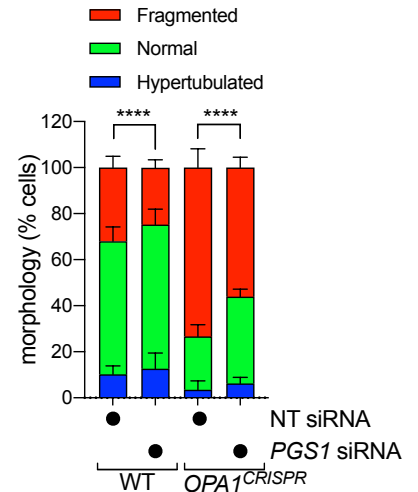



**Appendix Figure S3: STRING analysis of Mitome screen hits and validation of PGS1 downregulation in OPA1-deficient HeLa cells.**

**(A)** String analysis clustering of 91 candidate genes that rescued mitochondrial fragmentation in *OPA1*<sup>S545R</sup> fibroblasts upon depletion (Dataset EV3).

**(B)** Equal amounts of protein extracted from WT and *OPA1*<sup>CRISPR</sup> HeLa were separated by SDS-PAGE, immunoblotted with OPA1 antibody and quantified by densitometry relative to tubulin. Data represent mean  $\pm$  SEM of three independent experiments. Unpaired t-test; \*\*p<0.01.

**(C)** Representative confocal images of wild type (WT) and *OPA1*<sup>CRISPR</sup> HeLa cells treated with indicated siRNAs for 72 hours. Live imaging of mitochondria labelled with TMRE (Mitochondria, green), and NucBlue (Nuclei, blue). Scale bar=50 $\mu$ m.

**(D)** Supervised ML mitochondrial morphology quantification of (m) using WT HeLa cells treated with *OPA1* siRNA (fragmented), NT siRNA (normal), or *DNM1L* siRNA (hypertubulated) training sets. Data represent mean  $\pm$  SD of 8 replicates, One-way ANOVA; \*\*\*\*p <0.0001.

Appendix Figure 4

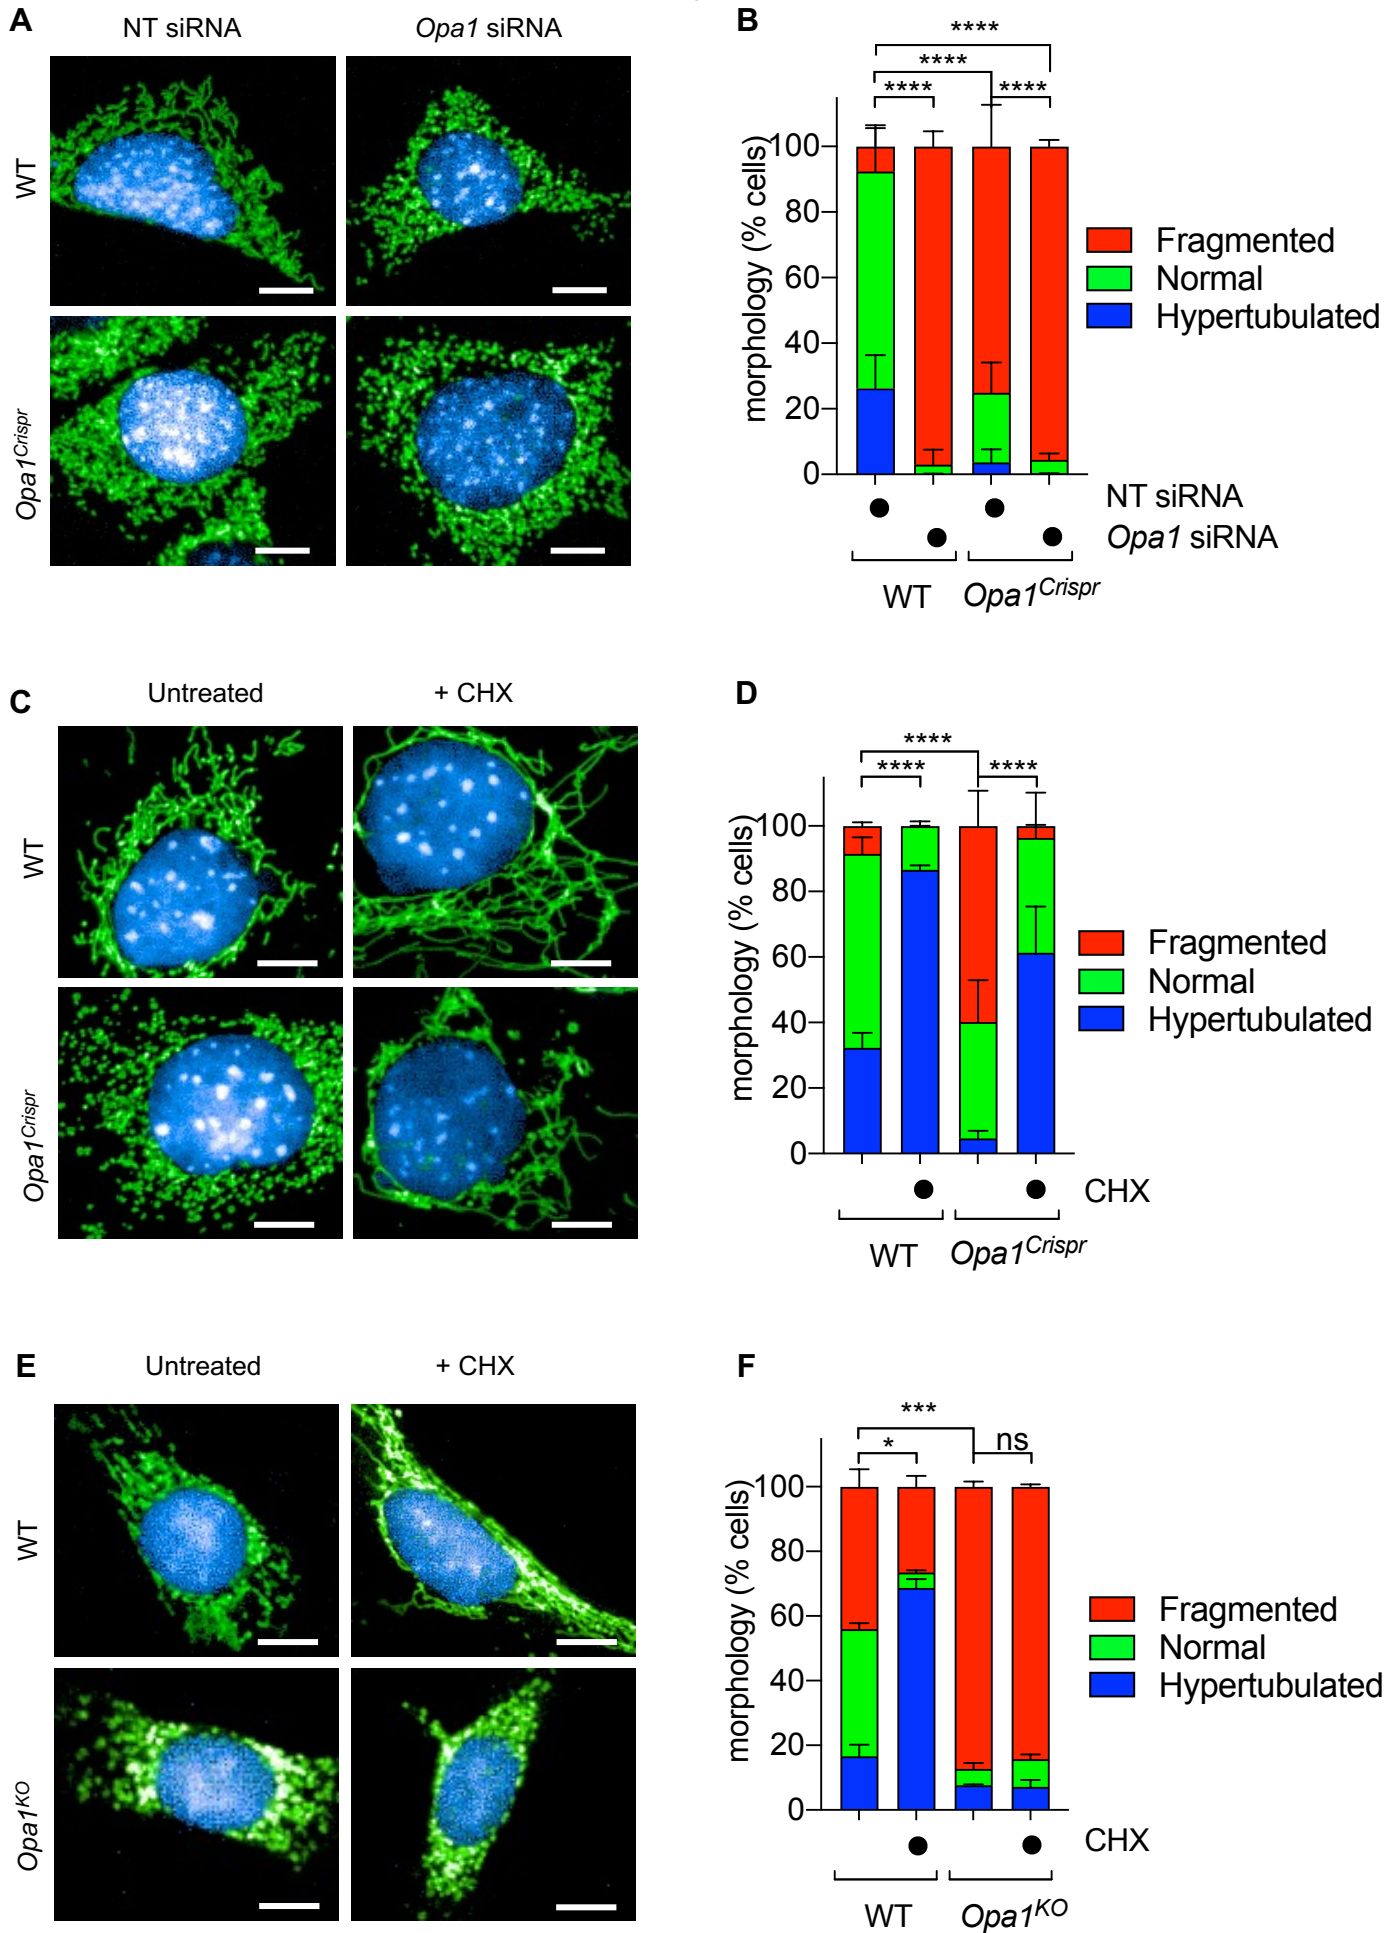

**Appendix Figure S4: Mitochondrial morphology and stress-induced hyperfusion analysis in *Opa1*-deficient MEFs.**

**(A)** Representative confocal images of wild type (WT) and *Opa1*<sup>Crispr</sup> MEFs treated with NT or *Opa1* siRNA for 72 hours. Live imaging of mitochondria (mitoYFP, green) and nuclei (NucBlue, blue). Scale bar=10μm.

**(B)** Mitochondrial morphology quantification of (i) using WT MEFs treated with *Opa1* siRNA (fragmented), NT siRNA (normal), or *Dnm1l* siRNA (hypertubulated) training sets. Data represent mean ± SD of three independent experiments, (550-822 cells per cell line), One-way ANOVA (% fragmented) ; \*\*\*\*p < 0.0001.

**(C)** Representative confocal images of wild type (WT) and *Opa1*<sup>Crispr</sup> MEFs treated with 50 μM cycloheximide (CHX) for 3 hours. Live imaging of mitochondria (mitoYFP, green) and nuclei (NucBlue, blue). Scale bar=10μm.

**(D)** Mitochondrial morphology quantification of (k) using WT MEFs treated with *Opa1* siRNA (fragmented), NT siRNA (normal), or *Dnm1l* siRNA (hypertubulated) training sets. Data represent mean ± SD of three independent experiments, (547-822 cells per cell line), One-way ANOVA (% fragmented) ; \*\*\*\*p < 0.0001.

**(E)** Representative confocal images of wild type (WT) and *Opa1*<sup>KO</sup> MEFs treated with 50 μM cycloheximide (CHX) for 3 hours. Live imaging of mitochondria (mitoYFP, green) and nuclei (NucBlue, blue). Scale bar=10μm.

**(F)** Mitochondrial morphology quantification of (m) using WT MEFs treated with *Opa1* siRNA (fragmented), NT siRNA (normal), or *Dnm1l* siRNA (hypertubulated) training sets. Data represent mean ± SD of two independent experiments, (638-1063 cells per cell line) One-way ANOVA (% hypertubulated) ; \*p < 0.05, \*\*\*p < 0.001, ns; not significant.

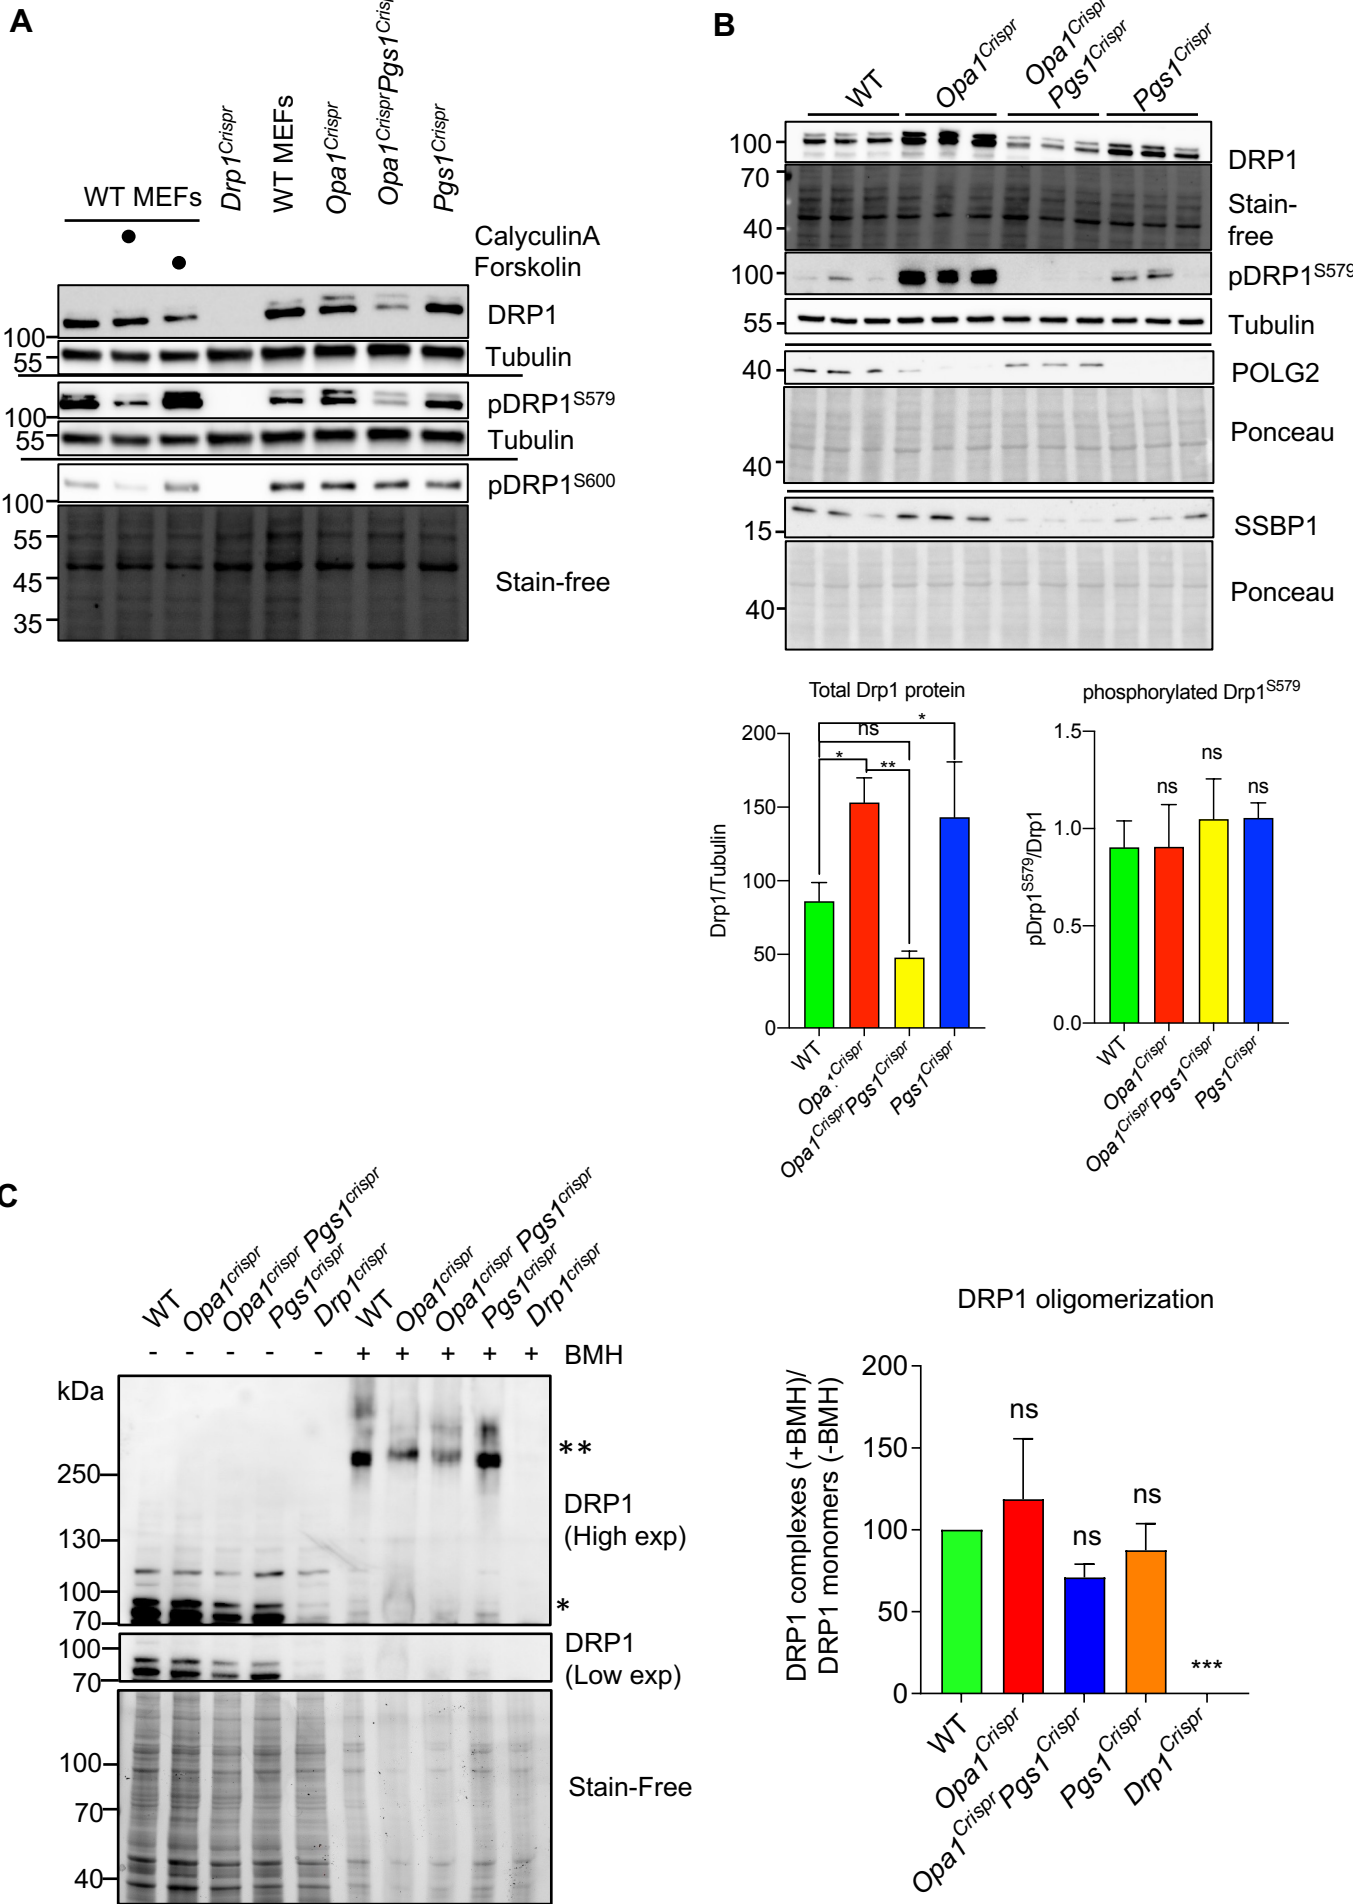

## Appendix Figure S5: Drp1 recruitment assays in MEFs

**(A)** Equal amounts of protein extracted from MEFs treated with CalyculinA or Forskolin, where indicated, were separated by SDS-PAGE, immunoblotted with the indicated antibody, Stain-Free or Ponceau.

**(B)** Equal amounts of protein extracted from MEFs were separated by SDS-PAGE, immunoblotted with the indicated antibody and quantified by densitometry relative to Stain-Free or Ponceau. Data represent mean  $\pm$  SD of three independent experiments, One-way ANOVA; \* $p < 0.05$ , \*\* $p < 0.01$ , ns; not significant.

**(C)** Equal amount of post-nuclear supernatant +/- cross-linked with 10mM BMH from MEFs of the indicated genotypes were separated by SDS-PAGE and immunoblotted with DRP1 antibody. \* and \*\* indicate DRP1 monomers and DRP1 complexes, respectively. The ration of DRP1 complexes over DRP1 monomers was quantified by densitometry relative to Stain-Free. Data represent mean  $\pm$  SD of 3 independent experiments, One-way ANOVA; \*\*\* $p < 0.001$ , ns; not significant



Appendix Figure 6

**A**

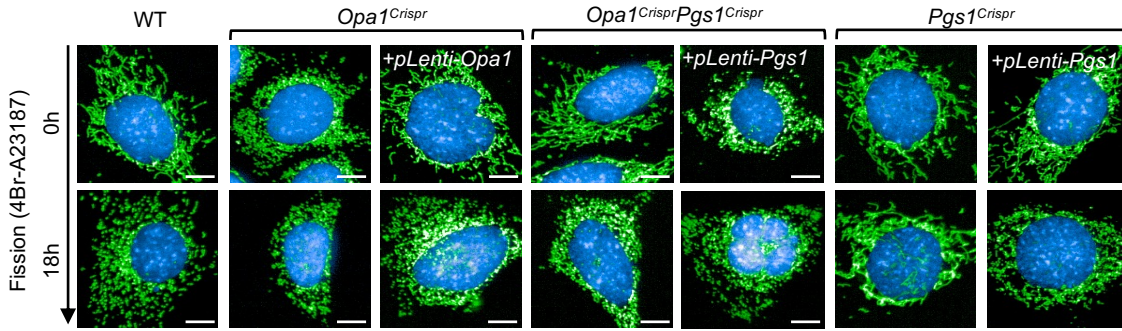

**B**

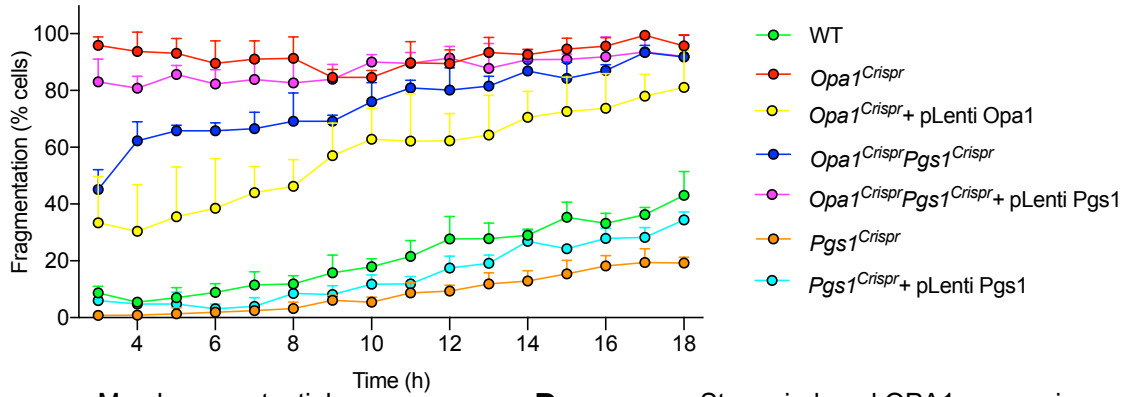

**C**

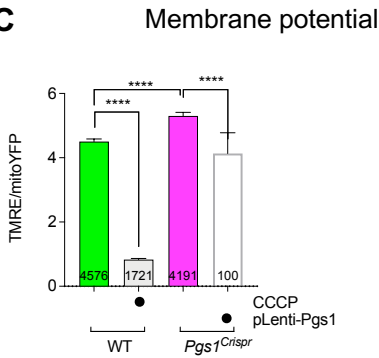

**D**

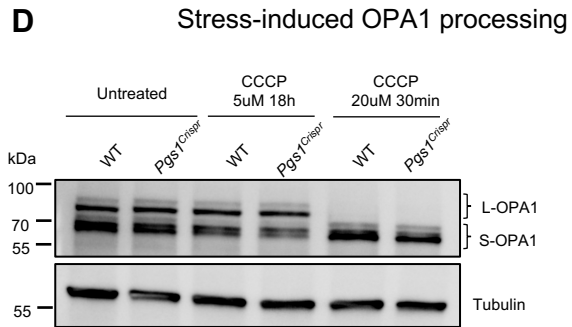

**E**

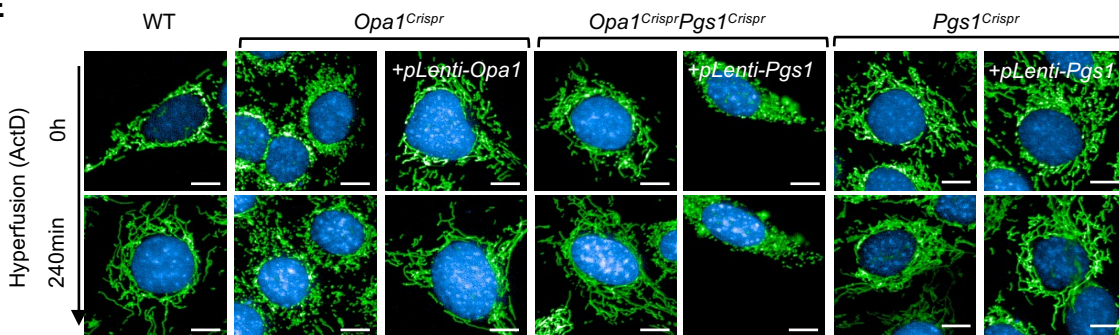

**F**

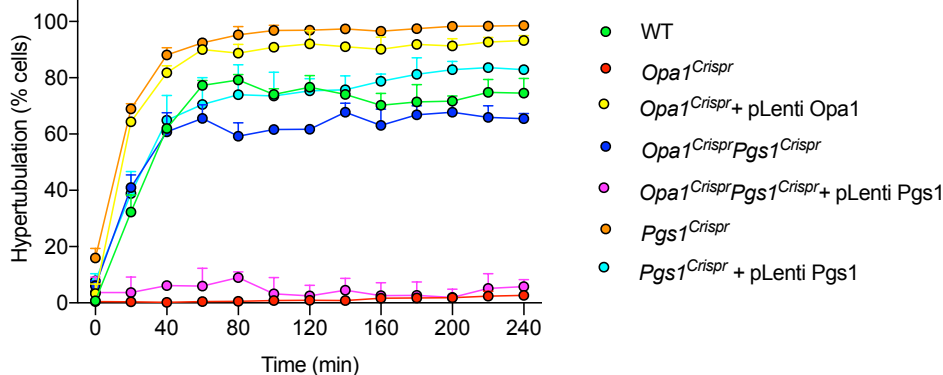

## Appendix Figure S6: Membrane potential and kinetic imaging of fission and hyperfusion in MEFs

**(A)** Representative confocal images of live cell imaging of MEFs of the indicated genotypes subjected to fission with 4Br-A23187 for the indicated time points. Images were captured every hour for 18 hours. Scale bar=10 $\mu$ m.

**(B)** Mitochondrial morphology quantification of (A) using WT MEFs treated with 5  $\mu$ M CCCP for 18h (fragmented), untreated (normal), or treated with 10  $\mu$ M CHX for 9h (hypertubulated) training sets. Data represent mean  $\pm$  SD of 3 independent experiments, (355-1196 cells per cell line) One-way ANOVA.

**(C)** Quantification of mitochondrial membrane potential (TMRE/mitoYFP) by confocal microscopy in WT and *Pgs1<sup>Crispr</sup>* MEFs treated as indicated. Number of analyzed cells indicated within bar. Data represent mean of all the cells  $\pm$  SEM of four independent experiments, One-way ANOVA; \*\*\*\*p < 0.0001.

**(D)** Equal amounts of protein extracted from WT and mutant MEFs treated with CCCP at the indicated concentrations and durations where indicated were separated by SDS-PAGE, immunoblotted with indicated antibodies.

**(E)** Representative confocal images of live cell imaging of MEFs of the indicated genotypes subjected to stress-induced mitochondrial hyperfusion (SiMH) with 0.5  $\mu$ M ActD for the indicated time points. Images were captured every 20 minutes for 240 minutes. Scale bar=10 $\mu$ m.

**(F)** Mitochondrial morphology quantification of using WT MEFs treated with 5  $\mu$ M CCCP for 18h (fragmented), untreated (normal), or treated with 10  $\mu$ M CHX for 9h (hypertubulated) training sets. Data represent mean  $\pm$  SD of 3 independent experiments, (262-1123 cells per cell line) One-way ANOVA.

## Appendix Figure 7

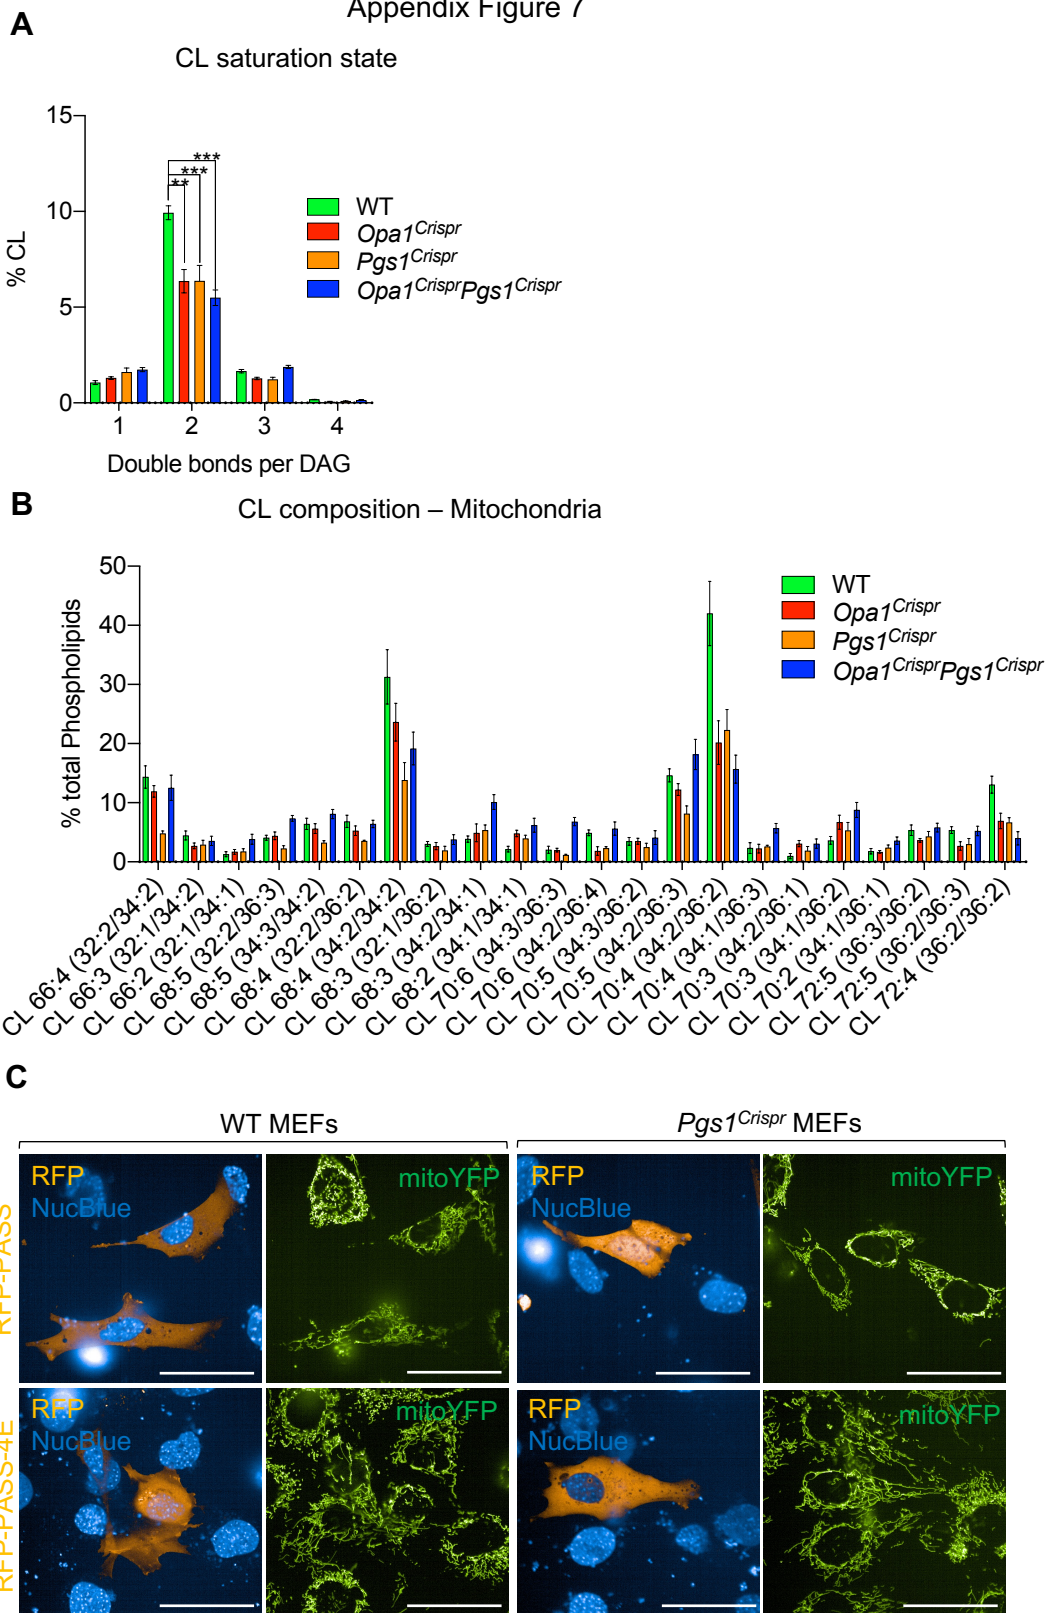

### Appendix Figure S7: Determination of cardiolipin profiling and phosphatidic acid accumulation in MEFs.

**(A)** Cardiolipin (CL) saturation state (carbon double bonds per DAG molecule) determined from purified mitochondria isolated from MEFs of the indicated genotypes. Data represent mean  $\pm$  SD of four independent experiments, One-way ANOVA; \*\* $p < 0.01$ , \*\*\* $p < 0.001$ .

**(B)** CL acyl chain composition determined from purified mitochondria isolated from MEFs of the indicated genotypes. Data represent mean  $\pm$  SD of four independent experiments.

**(C)** Representative confocal images of wild type (WT) and *Pgs1*<sup>Crispr</sup> MEFs transfected with wild type (RFP-PASS) or mutant (RFP-PASS-4E) PA sensors 48 hours. Live imaging of mitochondria labelled with mitoYFP (green), RFP (orange) and NucBlue (Nuclei, blue) revealed no recruitment of PA sensors to mitochondria. Scale bar=50 $\mu$ m.

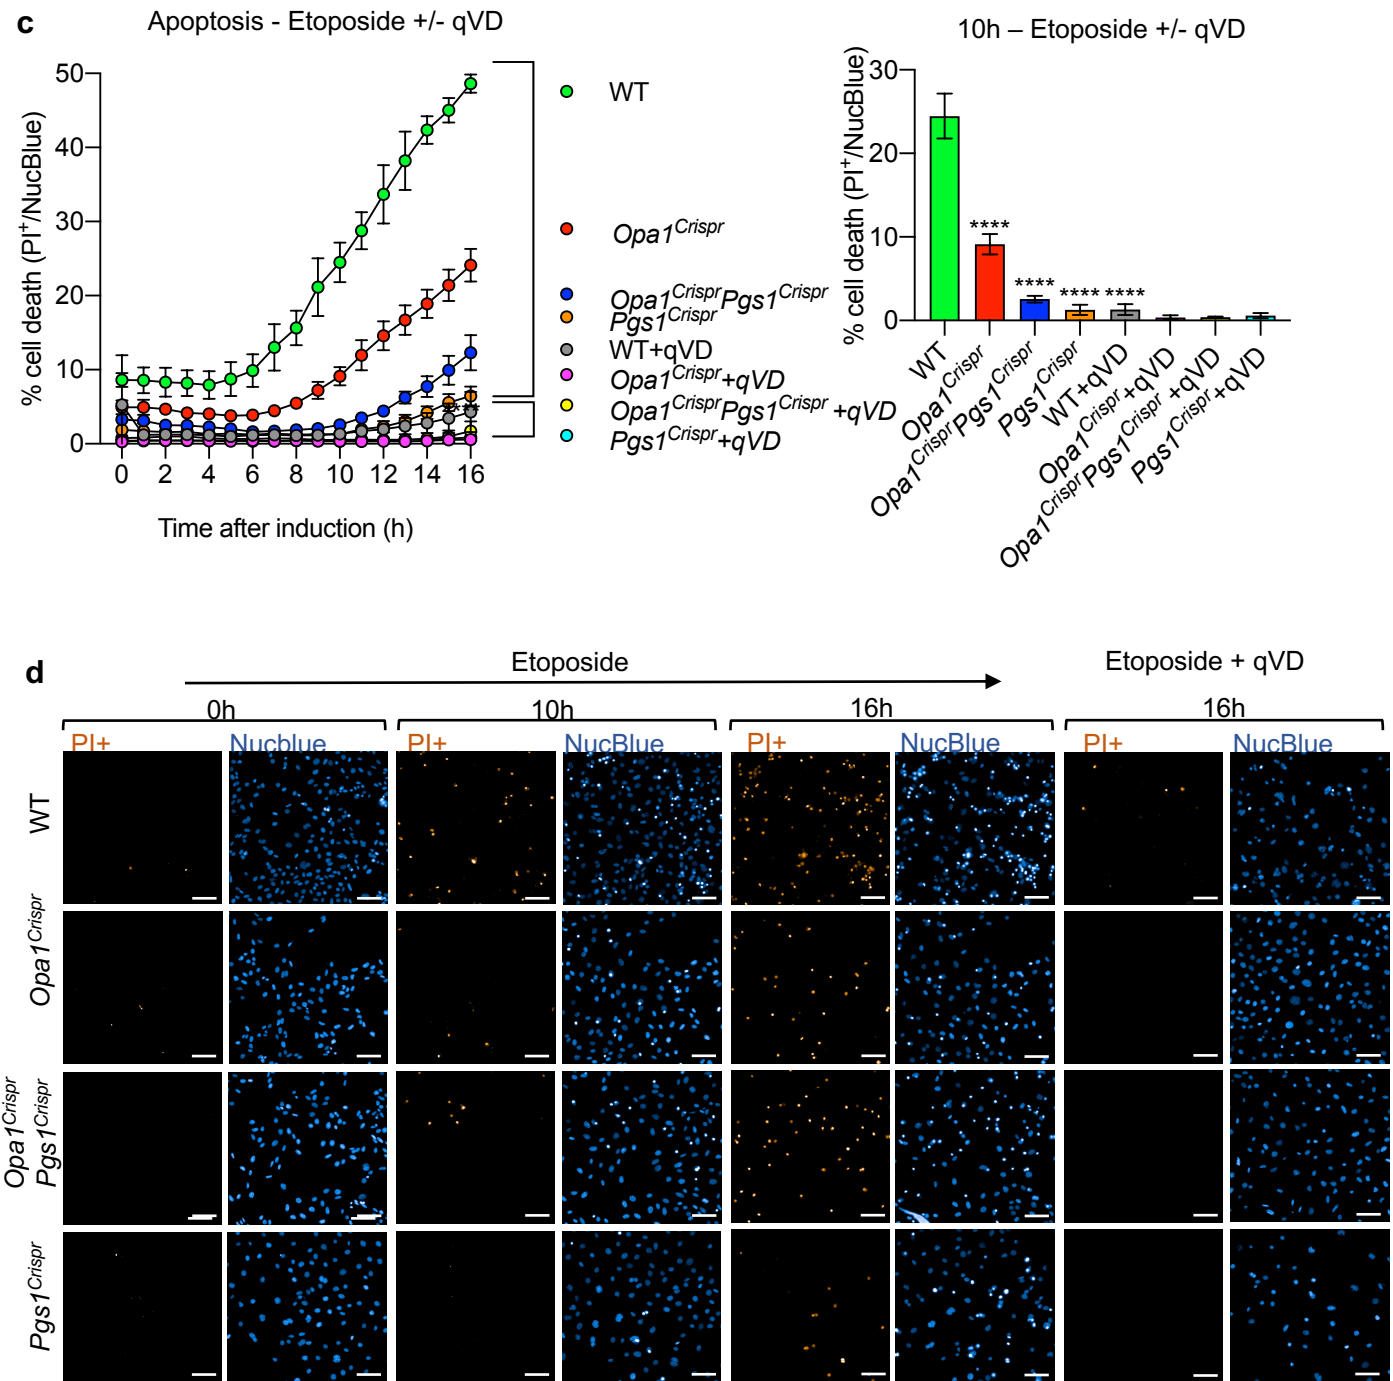

### Appendix Figure S8: Kinetic cell death imaging in MEFs triggered by etoposide

(A, B) MEFs of the indicated genotypes were subjected to 16  $\mu$ M etoposide in the presence or absence of the pan-caspase inhibitor qVD. Dead cells (PI+ nuclei, orange) and total cells (NucBlue, blue) were imaged every hour for 25 hours. PI+ nuclei number divided by the total nuclei number was then quantified over time. Representative confocal images of (B). Scale bar=100 $\mu$ m. Data represent mean  $\pm$  SD of four independent experiments, 1816-3915 cells per cell line) One-way ANOVA; \*\*\*\*p < 0.0001.
