# Supplementary material for: High‐throughput screening identifies suppressors of mitochondrial fragmentation in OPA1 fibroblasts
Source: PubMed Central journal article supplement (PMC8185549; doi:10.15252/emmm.202013579), 2021-05-20

Figure 1B

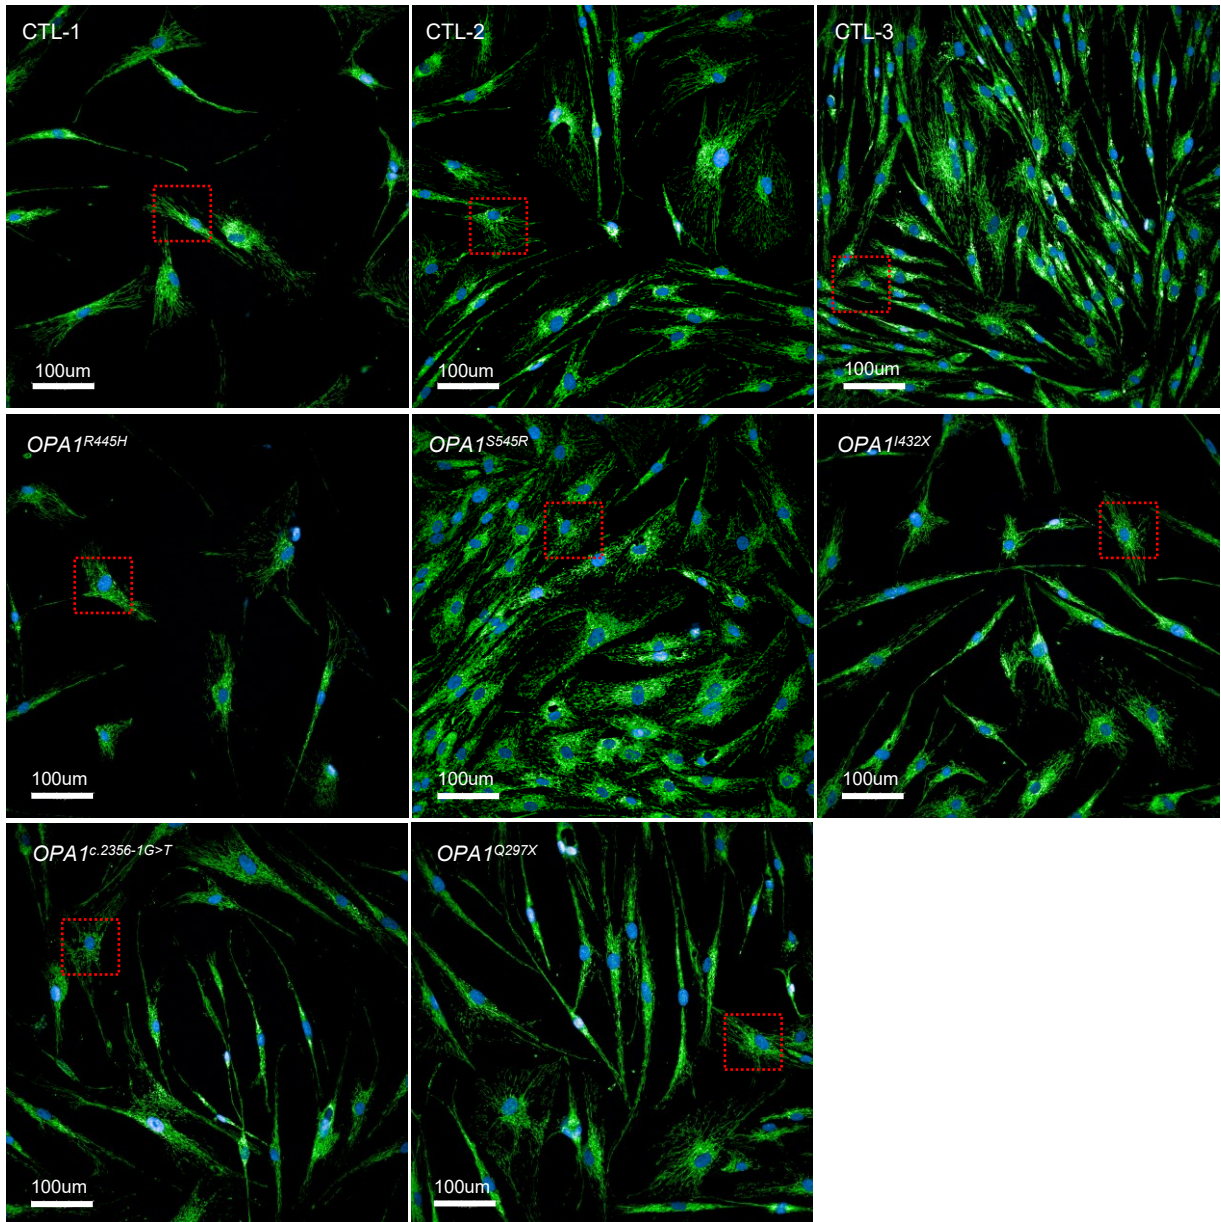

Figure 1D

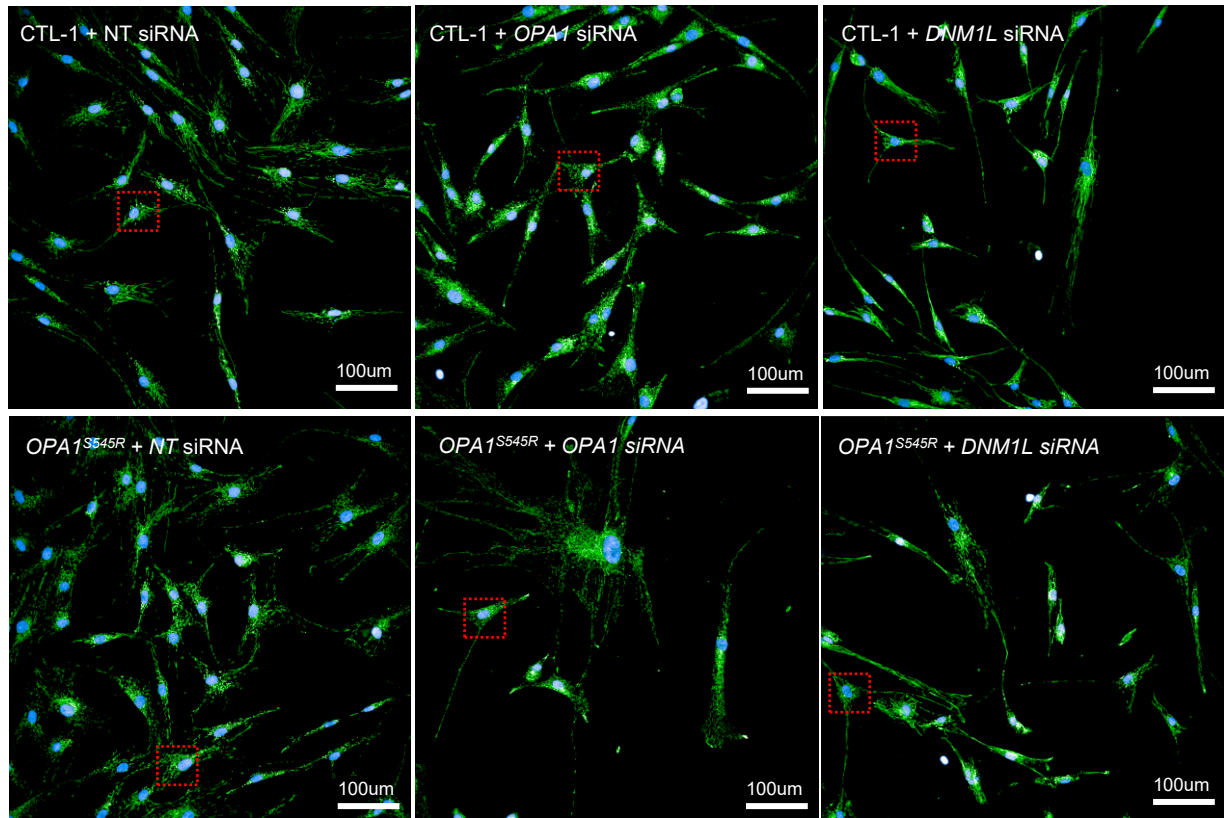

Figure 1F

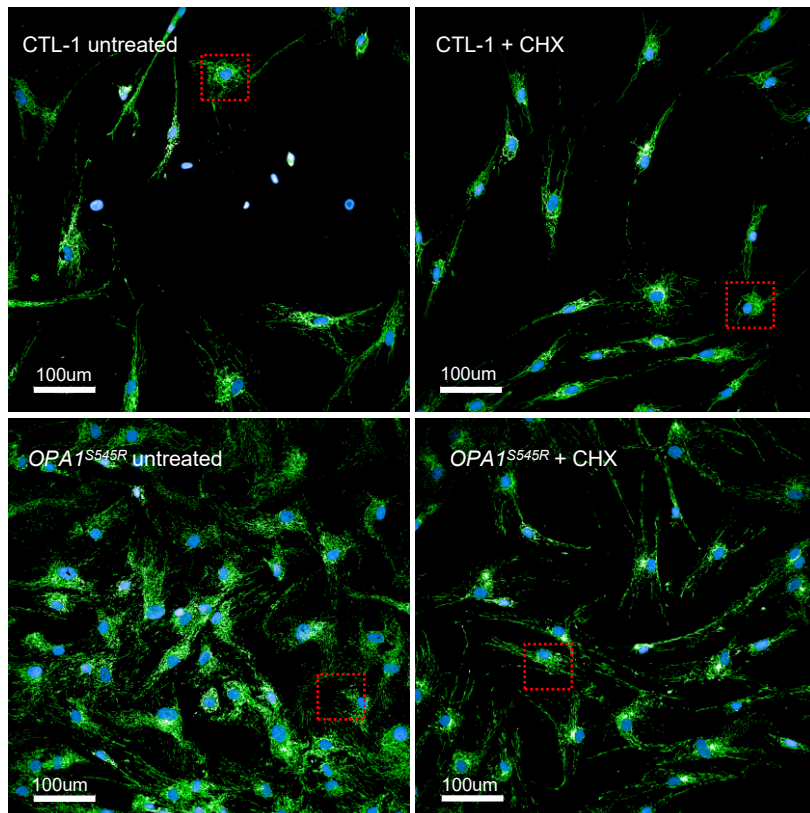

Supplement: EMMM-13-e13579-s009.pdf [file EMMM-13-e13579-s009.pdf]
