# Supplementary material for: High‐throughput screening identifies suppressors of mitochondrial fragmentation in OPA1 fibroblasts
Source: PubMed Central journal article supplement (PMC8185549; doi:10.15252/emmm.202013579), 2021-05-20

Figure 6C

WT

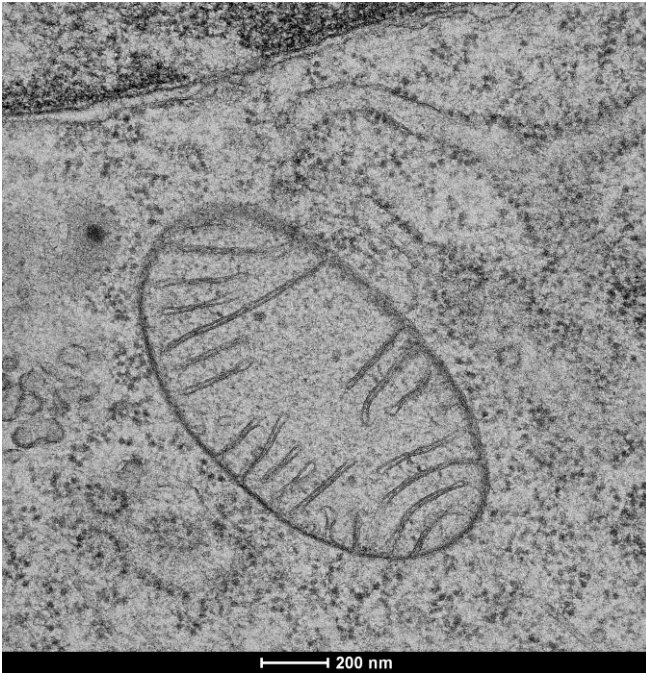

*Opa1*<sup>Crispr</sup>

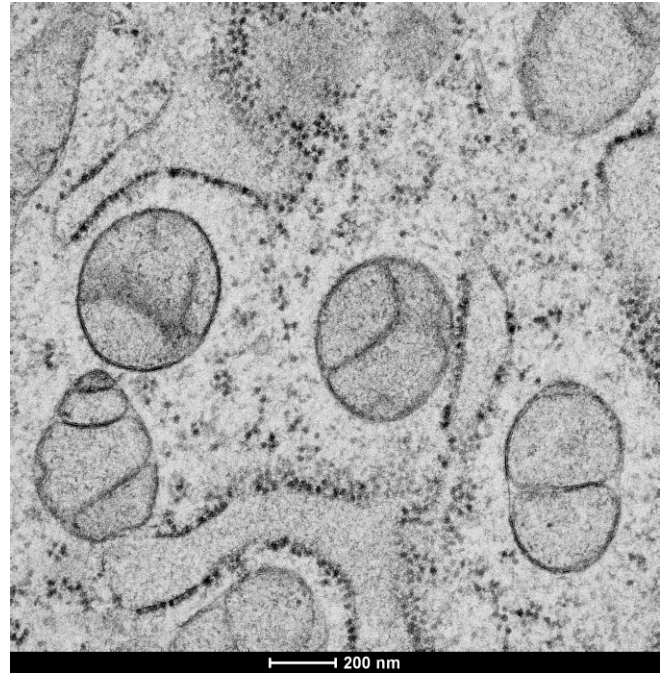

*Opa1*<sup>Crispr</sup>*Pgs1*<sup>Crispr</sup>

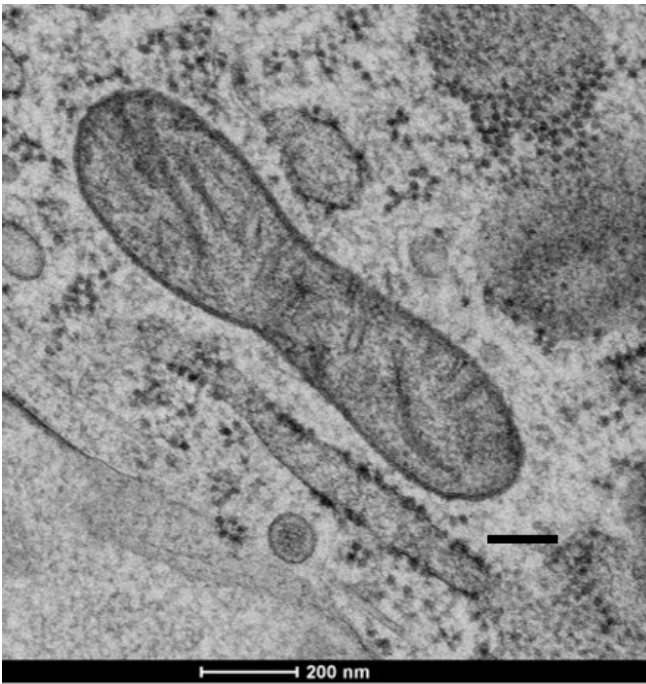

*Pgs1*<sup>Crispr</sup>

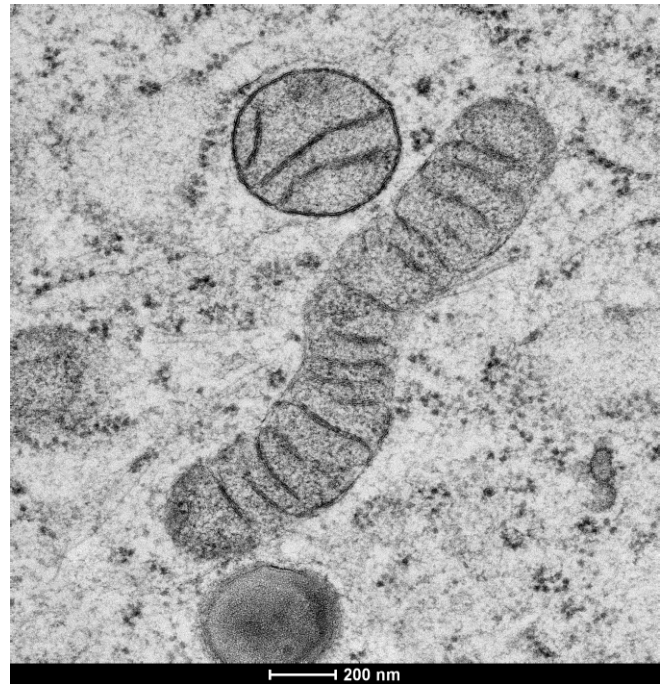

Supplement: EMMM-13-e13579-s016.pdf [file EMMM-13-e13579-s016.pdf]
